# Supplementary material
Source: MDPI journal article supplement (https://www.mdpi.com/2071-1050/14/11/6472)
Supplement: s1 [file s1]

# Supporting Information

Title: Improving the lipid profile of *Hermetia illucens* (Black Soldier Fly) for aquafeeds: current state of knowledge

Daniela P. Rodrigues<sup>1\*</sup>, Olga M. C. C. Ameixa<sup>2\*</sup>, José Antonio Vázquez<sup>3</sup>, Ricardo Calado<sup>1</sup>

<sup>1</sup> ECOMARE, CESAM - Centre for Environmental and Marine Studies, Department of Biology, University of Aveiro, Santiago University Campus, 3810-193 Aveiro, Portugal (rjcalado@ua.pt)

<sup>2</sup> CESAM - Centre for Environmental and Marine Studies, Department of Biology, University of Aveiro, Santiago University Campus, 3810-193 Aveiro, Portugal

<sup>3</sup> Group of Recycling and Valorisation of Waste Materials (REVAL), Marine Research Institute (IIM-CSIC), C/Eduardo Cabello, 6, CP 36208 Vigo, Galicia, España (jvazquez@iim.csic.es)

**Keywords:** fish meal, fish oil, fatty acids, insect feed, marine aquaculture, omega-3

\*Corresponding authors: [dmprodrigues@ua.pt](mailto:dmprodrigues@ua.pt); [olga.ameixa@ua.pt](mailto:olga.ameixa@ua.pt)

Table S1 – Relative abundance of molecular species of fatty acids (expressed as % of total pool of fatty acids) of *Hermetia illucens* larvae fed with different substrates retrieved from the literature surveyed.

|                            | Substrate tested     |                                 |                       |                                |                                           |                           |                       |                       |                        |                           |                      |                     |                     |                     |                     |                     |
|----------------------------|----------------------|---------------------------------|-----------------------|--------------------------------|-------------------------------------------|---------------------------|-----------------------|-----------------------|------------------------|---------------------------|----------------------|---------------------|---------------------|---------------------|---------------------|---------------------|
| BSF Fatty acids            | Philippine tung seed | Rice straw and Restaurant Waste | Palm kernel meal      | Ice cream industrial waste Mix | Pig manure, dog food, human feces (4:4:2) | Control diet Chicken feed | Fish discard          | n-3 enriched meal     | Layer mash             | Fish offal and Layer Mash | Bread                | Fish                | Food waste          | Fresh mussels       | Ensilse Mussels     | Rotten mussels      |
| (C4:0)                     |                      |                                 | 0.00                  | 0.04                           |                                           |                           |                       |                       |                        |                           |                      |                     |                     |                     |                     |                     |
| (C8:0)                     |                      |                                 | 0.04                  | 0.13                           |                                           |                           |                       | 0.1                   |                        |                           |                      |                     |                     |                     |                     |                     |
| (C10:0)                    |                      | 3.8                             | 1.27                  | 1.44                           | 1                                         |                           |                       | 0.9                   | 0.95                   | 1.02                      |                      |                     |                     |                     |                     |                     |
| (C11:0)                    |                      |                                 | 0.02                  | 0.02                           |                                           |                           |                       |                       |                        |                           |                      |                     |                     |                     |                     |                     |
| (C12:0)                    |                      | 27.8                            | 40.54                 | 46.72                          | 48                                        | Nd                        | 1.7                   | 22.6                  | 44.2                   | 48.3                      | 51.8                 | 28.6                | 39.9                | 52.1                | 13.4                | 32.3                |
| (C13:0)                    |                      |                                 | 0.05                  | 0.02                           |                                           |                           |                       |                       |                        |                           |                      |                     |                     |                     |                     |                     |
| (C14:0)                    |                      | 8.1                             | 15.57                 | 11.13                          | 7                                         | Nd                        | 8.2                   | 5.3                   |                        |                           | 9.5                  | 6.1                 | 6.7                 | 8.0                 | 5.8                 | 10.1                |
| (C15:0)                    |                      | 1.5                             | 0.00                  | 0.05                           |                                           |                           |                       |                       | 0.09                   | 0.03                      |                      |                     |                     |                     |                     |                     |
| (C16:0)                    | 10                   | 14.2                            | 14.55                 | 12.12                          | 14                                        | 15.2                      | 14.5                  | 17.9                  | 13.6                   | 13.4                      | 12.7                 | 12.6                | 16.3                | 11.9                | 21.9                | 19.8                |
| (C17:0)                    |                      | 0.8                             |                       |                                |                                           | Nd                        | 1.1                   | 0.3                   | 0.09                   | 0.11                      |                      |                     |                     |                     |                     |                     |
| (C18:0)                    |                      | 7.6                             | 2.13                  | 1.43                           | 2                                         | 3.2                       | 5.9                   | 4.6                   | 1.74                   | 2.06                      | 1.5                  | 2.2                 | 2.1                 | 1.6                 | 4.0                 | 3.3                 |
| (C19:0)                    |                      | 1.7                             |                       |                                |                                           |                           |                       |                       |                        |                           |                      |                     |                     |                     |                     |                     |
| (C20:0)                    | 2.5                  |                                 | 0.07                  | 0.07                           |                                           |                           |                       |                       | 0.23                   | 0.04                      |                      |                     |                     |                     |                     |                     |
| (C21:0)                    |                      |                                 | 0.22                  | 0.12                           |                                           |                           |                       |                       |                        |                           |                      |                     |                     |                     |                     |                     |
| (C22:0)                    |                      |                                 | 0.02                  | 0.03                           |                                           |                           |                       |                       | 0.02                   | 0.02                      |                      |                     |                     |                     |                     |                     |
| (C23:0)                    |                      |                                 | 0.04                  | 0.00                           |                                           |                           |                       |                       | 0.00                   | 0.02                      |                      |                     |                     |                     |                     |                     |
| (C24:0)                    |                      |                                 |                       |                                |                                           |                           |                       |                       | 0.00                   | 0.12                      |                      |                     |                     |                     |                     |                     |
| SFA (total)                | 12.5                 | 65.5                            | 74.52                 | 73.32                          | 72                                        | 18.3                      | 31.3                  | 51.7                  | 68.9                   | 72.0                      | 75.6                 | 49.6                | 65.2                | 73.7                | 45.3                | 65.6                |
| (C14:1)                    |                      |                                 | 0.22                  | 0.60                           |                                           |                           |                       |                       | 0.16                   | 0.20                      | 0.2 (n-5)            | 0.2(n-5)            | 0.2(n-5)            | 0.3(n-5)            | 0.4(n-5)            | 0.6(n-5)            |
| (C15:1)                    |                      |                                 |                       |                                |                                           |                           |                       |                       | 0.05                   | 0.02                      |                      |                     |                     |                     |                     |                     |
| (C16:1)                    |                      | 4.5                             | 2.21                  | 1.43                           | 2 (n-7)                                   | Nd (n-7)                  | 7.3 (n-7)             | 1.9 (n-7)             | 2.39                   | 3.82                      | 2.8 (n-7)            | 4.8(n-7)            | 2.6(n-7)            | 6.9(n-7)            | 14.1(n-7)           | 9.8(n-7)            |
| (C17:1)                    |                      |                                 | 0.10                  | 0.06                           |                                           | Nd                        | 1.0                   |                       | 0.13                   | 0.16                      |                      |                     |                     |                     |                     |                     |
| (C18:1)                    | 11.0                 | 22.5                            | 17.48                 | 15.95                          | 13 (n-9)                                  | 23.8 (n-9) /0.9 (n-7)     | 8.0 (n-9)/ 3.8 (n-7)  | 22.9(n-9) /1.0(n-7)   | 13.7 (n-9) 1.11 (n-11) | 13.3 (n-9) 1.05 (n-11)    | 12.0 (n-9) /0.1(n-7) | 25.1(n-9) /1.1(n-7) | 19.1(n-9) /0.4(n-7) | 10.3(n-9) /1.3(n-7) | 14.0(n-9) /2.2(n-7) | 12.9(n-9) /1.5(n-7) |
| (C20:1)                    |                      |                                 | 0.05                  | 0.02                           |                                           | Nd (n-9)                  | 4.0 (n-9)             | 0.4 (n-9)             | 0.11 (n-9)             | 0.09 (n-9)                |                      |                     |                     |                     |                     |                     |
| (C22:1)                    |                      |                                 |                       |                                |                                           | Nd (n-1)                  | 2.4 (n-1)             |                       | 0.08(n-9)              | 0.03(n-9)                 |                      |                     |                     |                     |                     |                     |
| (C24:1)                    |                      |                                 |                       |                                |                                           | Nd (n-9)                  | 1.1 (n-9)             |                       | 0.00                   | 0.00                      |                      |                     |                     |                     |                     |                     |
| MUFA (total)               | 11.0                 | 27.0                            | 20.06                 | 18.06                          | 16.0                                      | 24.7                      | 27.7                  | 26.2                  | 17.7                   | 18.7                      | 15.1                 | 31.8                | 22.4                | 19.5                | 32.1                | 26.2                |
| (C18:2)                    | 14.6                 | 1.8                             |                       |                                | 8 (n-6)/2(n-3)                            | 52.5 (n-6)                | 1.6 (n-6)             | 15.0(n-6)             | 11.0 (n-6)             | 4.28(n-6)                 | 7.7(n-6)             | 12.5(n-6)           | 9.9(n-6)            | 2.6(n-6)            | 4.5(n-6)            | 4.2(n-6)            |
| (C18:3)                    |                      | 2.1                             |                       |                                |                                           | 4.5 (n-3)                 | 1.1 (n-3)             | 0.9 (n-3)             | 0.02(n-6) /0.44(n-3)   | 0.05(n-6) /0.19(n-3)      | 1.6(n-3)             | 3.4(n-3)            | 1.8(n-3)            | 1.3(n-3)            | 3.6(n-3)            | 1.1(n-3)            |
| (C18:4)                    |                      |                                 |                       |                                |                                           | Nd (n-3)                  | 2.1 (n-3)             | 0.9(n-3)              |                        |                           |                      |                     |                     |                     |                     |                     |
| α-eleosteatic acid (C18:3) | 53                   |                                 |                       |                                |                                           |                           |                       |                       |                        |                           |                      |                     |                     |                     |                     |                     |
| (C20:2)                    |                      |                                 |                       |                                |                                           |                           |                       |                       | 0.08                   | 0.63                      |                      |                     |                     |                     |                     |                     |
| (C20:3)                    |                      |                                 |                       |                                |                                           |                           |                       |                       | 0.02(n-6) /0.02(n-3)   | 0.04(n-6) /0.07(n-3)      |                      |                     |                     |                     |                     |                     |
| (C20:4)                    |                      |                                 |                       |                                |                                           |                           |                       | 0.2(n-6)              | 0.05                   | 0.12                      | 0.0(n-6)             | 0.1(n-6)            | 0.2(n-6)            | 0.2(n-6)            | 1.3(n-6)            | 0.1(n-6)            |
| (C20:5)                    |                      |                                 | 0.15                  |                                |                                           | Nd (n-3)                  | 13.6 (n-3)            | 1.6 (n-3)             | 0.07                   | 1.00                      | 0.0(n-3)             | 1.7(n-3)            | 0.5(n-3)            | 2.0(n-3)            | 8.2(n-3)            | 1.9(n-3)            |
| (C22:2)                    |                      |                                 |                       |                                |                                           |                           |                       |                       | 0.96(n-6)              | 0.29(n-6)                 |                      |                     |                     |                     |                     |                     |
| (C22:5)                    |                      |                                 |                       |                                |                                           | Nd(n-3)                   | 1.7(n-3)              | 0.5 (n-3)             |                        | 0.32                      |                      |                     |                     |                     |                     |                     |
| (C22:6)                    |                      |                                 | 0.01                  |                                |                                           | Nd(n-3)                   | 21.4 (n-3)            | 0.7 (n-3)             |                        |                           | 0.0(n-3)             | 0.7(n-3)            | 0.0(n-3)            | 0.5(n-3)            | 4.5(n-3)            | 0.3(n-3)            |
| PUFA                       | 67.6                 | 3.9                             | 0.16                  |                                | 10                                        | 57.0                      | 41.5                  | 19.7                  | 12.6                   | 6.99                      | 9.3                  | 18.7                | 12.4                | 6.8                 | 22.6                | 8.2                 |
| Omega 6                    |                      |                                 | 4.47                  | 5.77                           | 8                                         | 52.5                      | 1.6                   | 15.2                  | 12.1                   | 5.42                      | 7.7                  | 12.6                | 10.1                | 2.8                 | 5.8                 | 4.3                 |
| Omega 3                    |                      |                                 | 0.32                  | 0.12                           | 2                                         | 4.5                       | 39.9                  | 4.5                   | 0.53                   | 1.57                      | 1.6                  | 5.9                 | 2.3                 | 3.8                 | 16.5                | 3.4                 |
| n-6/n-3                    |                      |                                 | 13.7                  | 48.08                          | 4                                         | 11.67                     | 0.04                  | 3.38                  | 22.9                   | 3.45                      | 4.81                 | 2.14                | 4.39                | 0.73                | 0.35                | 1.26                |
| Reference                  | (Abduh et al. 2018)  | (Zheng et al. 2012)             | (Alifian et al. 2019) | (Alifian et al. 2019)          | (Alipour et al. 2019)                     | (Barroso et al. 2019)     | (Barroso et al. 2019) | (Barroso et al. 2017) | (Cullere et al. 2019)  | (Cullere et al. 2019)     | (Ewald et al. 2020)  | (Ewald et al. 2020) | (Ewald et al. 2020) | (Ewald et al. 2020) | (Ewald et al. 2020) | (Ewald et al. 2020) |

Table S1 - Cont.

|                 | Substrate tested      |                       |                       |                       |                       |                   |                       |                      |                      |                      |                      |                                                   |                                               |                        |                        |
|-----------------|-----------------------|-----------------------|-----------------------|-----------------------|-----------------------|-------------------|-----------------------|----------------------|----------------------|----------------------|----------------------|---------------------------------------------------|-----------------------------------------------|------------------------|------------------------|
| BSF Fatty acids | Bread and Mussels 10% | Bread and Mussels 20% | Bread and Mussels 30% | Bread and Mussels 40% | Bread and Mussels 50% | Wheat bran        | Fermented maize straw | Fruit                | Vegetables           | Fruits/ Vegetables   | Seaweed 100%         | Coconut endosperm and soybean crude residue (3:2) | Commercial broiler chicken feed (L- prepupae) | Broiler and cow manure | Rye meal               |
| (C10:0)         |                       |                       |                       |                       |                       | 1.25              | 0.85                  | 1.1                  | 1.5                  | 1.0                  |                      |                                                   | 0.8                                           | 0.8                    |                        |
| (C12:0)         | 47.4                  | 47.6                  | 43.6                  | 42.0                  | 35.3                  | 38.26             | 22.36                 | 68.0                 | 25.0                 | 41.5                 |                      | 16.1                                              | 78.4                                          | 31.9                   | 47.7                   |
| (C14:0)         | 8.7                   | 8.5                   | 8.0                   | 7.8                   | 6.8                   | 6.28              | 4.41                  | 7.6                  | 5.4                  | 7.4                  | 10.4                 | 3.0                                               | 8.8                                           | 5.5                    | 11.5                   |
| (C16:0)         | 13.9                  | 14.3                  | 14.7                  | 14.6                  | 15.8                  | 11.84             | 13.15                 | 8.3                  | 15.4                 | 12.8                 | 11.0                 | 4.8                                               | 5.3                                           | 21.9                   | 15.6                   |
| (C17:0)         |                       |                       |                       |                       |                       | 2.93              | 2.73                  |                      |                      |                      |                      |                                                   |                                               |                        |                        |
| (C18:0)         | 2.7                   | 2.9                   | 2.7                   | 2.8                   | 3.1                   | 1.72              | 1.90                  | 0.9                  | 4.9                  | 1.7                  | 0.5                  | 9.22                                              | 0.6                                           | 2.7                    | 2.2                    |
| (C20:0)         |                       |                       |                       |                       |                       |                   |                       |                      |                      |                      |                      |                                                   |                                               |                        | 0.1                    |
| SFA total       | 72.8                  | 73.5                  | 69.2                  | 67.4                  | 61.3                  | 62.28             | 45.41                 | 86.0                 | 56.5                 | 65.0                 | 22.7                 | 47.0                                              | 93.9                                          | 62.8                   | 77.1                   |
| (C14:1)         | 0.2(n-5)              | 0.2(n-5)              | 0.2(n-5)              | 0.3(n-5)              | 0.2(n-5)              |                   |                       |                      |                      |                      |                      |                                                   |                                               |                        |                        |
| (C16:1)         | 3.1(n-7)              | 3.8(n-7)              | 4.6(n-7)              | 5.2(n-7)              | 5.9(n-7)              | 0.49              | 1.23                  | 3.8 (n-7)            | 10.0(n-7)            | 1.4 (n-7)            | 1.8 (n-7)            | 8.4                                               | 0.6                                           | 2.3 (n-9)              | 0.1 (n-7)/ 3.9 (n-9)   |
| (C17:1)         |                       |                       |                       |                       |                       | n.d               | 0.34                  |                      |                      |                      |                      |                                                   |                                               |                        |                        |
| (C18:1)         | 13.3(n-9)/0.8(n-7)    | 11.7(n-9)/1.2(n-7)    | 12.3(n-9)/1.2(n-7)    | 13.2(n-9)/1.2(n-7)    | 14.0(n-9)/1.5(n-7)    | 15.84             | 23.29                 | 7.1 (n-9)            | 11.8 (n-9)           | 8.7 (n-9)            | 31.3 (n-9)           | 16.93                                             | 2.0 (n-9)                                     | 20.2 (n-9)             | 9.7                    |
| (C20:1)         |                       |                       |                       |                       |                       |                   |                       |                      |                      |                      |                      | 1.0                                               |                                               |                        |                        |
| (C22:1)         |                       |                       |                       |                       |                       |                   |                       |                      |                      |                      |                      | 7.28                                              |                                               |                        |                        |
| MUFA            | 17.6                  | 17.2                  | 18.8                  | 20.3                  | 22.2                  |                   |                       | 11.2                 | 27.2                 | 11.0                 | 34.4                 | 34.4                                              | 2.6                                           | 22.5                   | 13.7                   |
| (C18:2)         | 5.6(n-6)              | 4.5(n-6)              | 4.8(n-6)              | 4.5(n-6)              | 5.9(n-6)              | 15.46 (n-6)       | 24.02 (n-6)           | 2.3 (n-6)            | 7.5 (n-6)            | 21.2 (n-6)           | 8.2 (n-6)            |                                                   | 3.2 (n-6)                                     | 13.0 (n-6)             | 6.1 (n-6))             |
| (C18:3)         | 2.6(n-3)              | 2.2(n-3)              | 2.7(n-3)              | 2.6(n-3)              | 3.4(n-3)              | 1.11 (n-3)        | 1.35 (n-3)            | 0.5 (n-3)            | 5.8 (n-3)            | 2.6 (n-6)            | 3.2 (n-3)            |                                                   | 0.2 (n-3)                                     | 1.7(n-3)               | 0.8 (n-3)              |
| (C18:4)         |                       |                       |                       |                       |                       |                   |                       |                      |                      |                      | 2.6 (n-3)            |                                                   |                                               |                        |                        |
| (C20:2)         |                       |                       |                       |                       |                       |                   |                       |                      |                      |                      | 1.5 (n-6)            |                                                   |                                               |                        |                        |
| (C20:4)         | 0.1(n-6)              | 0.1(n-6)              | 0.2(n-6)              | 0.3(n-6)              | 0.4(n-6)              |                   |                       |                      |                      |                      | 12.4 (n-6)           |                                                   |                                               |                        |                        |
| (C20:5)         | 0.9(n-3)              | 1.7(n-3)              | 3.0(n-3)              | 3.5(n-3)              | 4.8(n-3)              |                   |                       |                      |                      |                      | 6.6 (n-3)            |                                                   |                                               |                        |                        |
| (C22:2)         |                       |                       |                       |                       |                       |                   |                       |                      |                      |                      |                      | 0.52(n-6)                                         |                                               |                        |                        |
| (C22:6)         | 0.3(n-3)              | 0.5(n-3)              | 0.9(n-3)              | 1.1(n-3)              | 1.7(n-3)              |                   |                       |                      |                      |                      |                      |                                                   |                                               |                        |                        |
| PUFA            | 9.6                   | 9.3                   | 12.0                  | 12.2                  | 16.6                  | 16.57             | 25.37                 | 2.8                  | 16.2                 | 24.1                 | 37.8                 | 0.52                                              | 3.4                                           | 14.7                   | 6.9                    |
| Omega 6         | 5.8                   | 4.6                   | 5.3                   | 5.0                   | 6.7                   |                   |                       | 2.3                  | 8.3                  | 20.4                 | 23.6                 | 0.52                                              | 3.2                                           | 13.0                   | 6.1                    |
| Omega 3         | 3.8                   | 4.4                   | 6.7                   | 7.2                   | 9.9                   |                   |                       | 0.5                  | 6.8                  | 2.8                  | 14.1                 |                                                   | 0.2                                           | 1.7                    | 0.8                    |
| n-6/n-3         | 1.53                  | 1.05                  | 0.79                  | 0.69                  | 0.68                  |                   |                       | 4.6                  | 1.2                  | 7.3                  | 1.67                 |                                                   | 16.0                                          | 7.65                   | 7.62                   |
| Reference       | (Ewald et al. 2020)   | (Gao et al. 2019) | (Gao et al. 2019)     | (Jucker et al. 2017) | (Jucker et al. 2017) | (Jucker et al. 2017) | (Liland et al. 2017) | (Lim et al. 2019)                                 | (Liu et al. 2017)                             | (Mai et al. 2019)      | (Matthäus et al. 2019) |



Table S1 - Cont.

| BSF Fatty acids | Substrate tested          |                        |                      |                       |                                        |                        |                      |                          |                          |                          |                          |                                     |                                     |                                     |                                     |                                        |
|-----------------|---------------------------|------------------------|----------------------|-----------------------|----------------------------------------|------------------------|----------------------|--------------------------|--------------------------|--------------------------|--------------------------|-------------------------------------|-------------------------------------|-------------------------------------|-------------------------------------|----------------------------------------|
|                 | Control diet              | Biodecomposed media    | Dairy Cow Manure     | Fish Offal+Cow Manure | SCR with <i>Lactobacillus buchneri</i> | Soybean crude residues | Artificial feed      | Chicken feed             | Digestate                | Vegetable waste          | Restaurant waste         | Cow manure                          | 10% fish offal and 90% cow manure   | 25% fish offal and 75% cow manure   | 50% fish offal and 50% cow manure   | 24 h 22% fish offal and 78% cow manure |
| (C10:0)         | 1.09                      | 0.86                   |                      |                       | 1.5                                    | 1.7                    | 2.2                  | 1.4                      | 1.2                      | 1.6                      | 2.0                      |                                     |                                     |                                     |                                     |                                        |
| (C12:0)         | 36.40                     | 40.79                  | 23.6                 | 37.1                  | 39.6                                   | 36.9                   | 41.3                 | 57.3                     | 43.6                     | 60.9                     | 57.6                     | 20.9                                | 34.1                                | 41.0                                | 42.6                                | 14.7                                   |
| (C13:0)         | 0.02                      | 0.02                   |                      |                       |                                        |                        |                      |                          |                          |                          |                          |                                     |                                     |                                     |                                     |                                        |
| (C14:0)         | 6.89                      | 6.56                   | 5.1                  | 6.3                   | 6.5                                    | 5.9                    | 6.5                  | 7.3                      | 6.9                      | 9.5                      | 7.1                      | 2.85                                | 6.46                                | 6.67                                | 6.91                                | 4.51                                   |
| (C15:0)         | 0.13                      | 0.13                   |                      |                       | 0.4                                    | 0.4                    | 0.7                  |                          |                          |                          |                          |                                     |                                     |                                     |                                     |                                        |
| (C16:0)         | 15.31                     | 16.27                  | 19.8                 | 17.3                  | 13.1                                   | 13.2                   | 12.6                 | 9.6                      | 10.1                     | 8.7                      | 10.3                     | 16.05                               | 14.3                                | 12.08                               | 11.14                               | 16.5                                   |
| (C17:0)         | 0.08                      | 0.12                   |                      |                       | 0.4                                    | 0.4                    | 0.7                  |                          |                          |                          |                          |                                     |                                     |                                     |                                     |                                        |
| (C18:0)         | 3.35                      | 7.34                   | 6.5                  | 2.0                   | 2.1                                    | 1.7                    | 1.6                  | 1.4                      | 1.7                      | 1.1                      | 1.0                      | 5.68                                | 2.35                                | 1.64                                | 1.29                                | 6.22                                   |
| (C19:0)         | 0.01                      | 0.01                   |                      |                       |                                        |                        |                      |                          |                          |                          |                          |                                     |                                     |                                     |                                     |                                        |
| (C20:0)         | 0.05                      | 0.08                   |                      |                       |                                        |                        |                      |                          |                          |                          |                          |                                     |                                     |                                     |                                     |                                        |
| (C22:0)         | 0                         | 0.01                   |                      |                       |                                        |                        |                      |                          |                          |                          |                          |                                     |                                     |                                     |                                     |                                        |
| SFA             | 63.33                     | 72.19                  | 55.0                 | 62.7                  | 63.6                                   | 60.2                   | 65.6                 | 77.4                     | 64.8                     | 82.8                     | 78.3                     | 45.48                               | 57.21                               | 61.39                               | 61.94                               | 41.93                                  |
| (C14:1)         |                           |                        |                      |                       | 1.0                                    | 1.1                    | 1.3                  |                          |                          |                          |                          |                                     |                                     |                                     |                                     |                                        |
| (C15:1)         |                           |                        |                      |                       | 0.5                                    | 0.5                    | 0.5                  |                          |                          |                          |                          |                                     |                                     |                                     |                                     |                                        |
| (C16:1)         | 2.39 (n-7)<br>0.72 (n-9)  | 2.36 (n7) 0.45 (n-9)   | 6.3 (n-7)            | 7.6 (n-7)             | 2.7 (n-7)                              | 3.2 (n-7)              | 4.3 (n-7)            | 2.0                      | 7.6                      | 2.9                      | 3.3                      |                                     |                                     |                                     |                                     |                                        |
| (C17:1)         |                           |                        |                      |                       | 0.6                                    | 0.8                    | 1.3                  |                          |                          |                          |                          |                                     |                                     |                                     |                                     |                                        |
| (C18:1)         | 21.10 (n-9)<br>0.58 (n-7) | 18.24 (n-9) 0.67 (n-7) | 22.7 (n-9)           | 18.8 (n-9)            | 11.5(n-9)                              | 12.1(n-9)              | 10.1 (n-9)           | 7.5(n-9) 0.2 (n-11)      | 7.9 (n-9)<br>2.3 (n-11)  | 5.7(n-9)<br>0.3 (n-11)   | 8.0(n-9)<br>0.1(n-11)    | 32.11 (n-9)                         | 16.52 (n-9)                         | 13.96 (n-9)                         | 12.28 (n-9)                         | 27.00 (n-9)                            |
| (C20:1)         | 0.09 (n-7)                | 0.10 (n-7)             |                      |                       |                                        |                        |                      |                          |                          |                          |                          |                                     |                                     |                                     |                                     |                                        |
| MUFA            | 24.88                     | 21.82                  | 29.0                 | 26.4                  | 16.3                                   | 17.7                   | 17.5                 | 10.0                     | 19.1                     | 9.5                      | 12.0                     | 32.11                               | 16.52                               | 13.96                               | 12.28                               | 27.00                                  |
| (C18:2)         | 11.01 (n-6)               | 10.7 (n-6)             | 6.8 (n-6)            | 5.9 (n-6)             | 17.5(n-6)                              | 17.0(n-6)              | 12.8 (n-6)           | 11.5 (n-6)               | 7.9 (n-6)                | 4.5(n-6)                 | 7.8 (n-6)                | 4.51 (n-6)                          | 3.96 (n-6)                          | 3.22 (n-6)                          | 3.57 (n-6)                          | 3.89 (n-6)                             |
| (C18:3)         | 2.5 (n-3)                 | 1.6 (n-3)              | 0.0                  | 0.5 (n-3)             | 1.4 (n-3)                              | 1.2 (n-3)              | 0.9 (n-3)            | 0.7 (n-3)                | 0.8 (n-3)                | 1.4(n-3)                 | 1.1 (n-3)                | 0.19 (n-3)                          | 0.74 (n-3)                          | 0.71 (n-3)                          | 0.74 (n-3)                          | 0.86 (n-3)                             |
| (C18:4)         |                           |                        | 0.0                  | 0.5 (n-3)             |                                        |                        |                      | 0.07 (n-3)               | 0.6 (n-3)                | 0.9 (n-3)                | 0.05 (n-3)               |                                     |                                     |                                     |                                     |                                        |
| (C20:4)         | 0.02 (n-6)                | 0.02 (n-6)             |                      |                       | 1.3 (n-6)                              | 1.3 (n-6)              | 2.3(n-6)             |                          |                          |                          |                          | 0.04 (n-6)                          | 0.2 (n-6)                           | 0.18 (n-6)                          | 0.2 (n-6)                           | 0.19 (n-6)                             |
| (C20:5)         | 0.04 (n-3)                | 0.02 (n-3)             | 0.1 (n-3)            | 3.5 (n-3)             | 0.4 (n-3)                              | 0.4 (n-3)              | 0.4(n-3)             | 0.06 (n-3)               | 0.1(n-3)                 | 0.01 (n-3)               | 0.2 (n-3)                | 0.03 (n-3)                          | 1.76 (n-3)                          | 1.63 (n-3)                          | 1.66 (n-3)                          | 1.43 (n-3)                             |
| (C22:5)         |                           |                        | 0                    | 0.35 (n-3)            |                                        |                        |                      |                          |                          |                          |                          | 0                                   | 0.1 (n-3)                           | 0.11 (n-3)                          | 0.14 (n-3)                          | 0.53 (n-3)                             |
| (C22:6)         |                           |                        | 0                    | 1.7 (n-3)             |                                        |                        |                      | 0.01 (n-3)               | 0.02(n-3)                | 0.01(n-3)                | 0.01 (n-3)               | 0.006 (n-3)                         | 0.41 (n-3)                          | 0.43 (n-3)                          | 0.59 (n-3)                          | 1.66 (n-3)                             |
| PUFA            | 13.57                     | 12.34                  | 6.9                  | 12.45                 | 20.6                                   | 19.90                  | 16.4                 | 12.34                    | 9.42                     | 6.82                     | 9.1                      | 4.78                                | 7.17                                | 6.33                                | 6.9                                 | 8.56                                   |
| Omega 6         | 11.03                     | 10.72                  | 6.80                 | 5.90                  | 18.80                                  | 18.30                  | 15.10                | 11.60                    | 8.00                     | 4.60                     | 8.00                     | 4.55                                | 4.26                                | 3.57                                | 3.91                                | 4.60                                   |
| Omega 3         | 2.54                      | 1.62                   | 0.10                 | 6.55                  | 1.80                                   | 1.60                   | 1.30                 | 0.90                     | 1.60                     | 2.30                     | 1.40                     | 0.23                                | 2.91                                | 2.76                                | 2.99                                | 3.96                                   |
| n-6/n-3         | 4.34                      | 6.62                   | 68                   | 0.90                  | 10.44                                  | 11.44                  | 11.61                | 12.89                    | 5.0                      | 2                        | 5.71                     | 19.78                               | 1.46                                | 1.29                                | 1.31                                | 1.16                                   |
| Reference       | (Rabani et al. 2019)      | (Rabani et al. 2019)   | (Sealey et al. 2011) | (Sealey et al. 2011)  | (Somroo et al. 2019)                   | (Somroo et al. 2019)   | (Somroo et al. 2019) | (Spranghers et al. 2017) | (St-Hilaire, Cranfill, et al. 2007)    |

Table S1 - Cont.

|                 | Substrate tested                    |                        |                        |                                                 |                                                  |                                                  |                                                  |                                             |                                              |                                              |                                              |                                  |                                                   |                         |                           |                            |                            |                            |
|-----------------|-------------------------------------|------------------------|------------------------|-------------------------------------------------|--------------------------------------------------|--------------------------------------------------|--------------------------------------------------|---------------------------------------------|----------------------------------------------|----------------------------------------------|----------------------------------------------|----------------------------------|---------------------------------------------------|-------------------------|---------------------------|----------------------------|----------------------------|----------------------------|
| BSF Fatty acids | Swine manure                        | Food waste             | 100% coffee silverskin | Coffee silverskin + 5% <i>Schyzochytrium sp</i> | Coffee silverskin + 10% <i>Schyzochytrium sp</i> | Coffee silverskin + 20% <i>Schyzochytrium sp</i> | Coffee silverskin + 25% <i>Schyzochytrium sp</i> | Coffee silverskin + 5% <i>Isochrysis sp</i> | Coffee silverskin + 10% <i>Isochrysis sp</i> | Coffee silverskin + 20% <i>Isochrysis sp</i> | Coffee silverskin + 25% <i>Isochrysis sp</i> | By-products from roasting coffee | Corn meal and fruit and vegetable mixture (50:50) | Coconut Endosperm Waste | Cereal Mix 1              | Cereal Mix 2               | Cereal Mix 3               | Cereal Mix 4               |
| (C10:0)         |                                     |                        | 0.25                   | 0.38                                            | 0.52                                             | 0.85                                             | 0.55                                             | 0.87                                        | 1.03                                         | 0.94                                         | 0.85                                         | 0.15                             | 0.003                                             | 2.2                     |                           |                            |                            |                            |
| (C12:0)         | 49.3                                | 44.9                   | 14.1                   | 9.4                                             | 8.0                                              | 19.5                                             | 19.9                                             | 28.3                                        | 32.5                                         | 30.2                                         | 28.2                                         | 0.2                              | 0.026                                             | 63.1                    | 0.64                      | 0.37                       | 0.22                       | 0.17                       |
| (C13:0)         |                                     |                        |                        |                                                 |                                                  |                                                  |                                                  |                                             |                                              |                                              |                                              | 0.03                             | Nd                                                |                         |                           |                            |                            |                            |
| (C14:0)         | 6.8                                 | 8.3                    | 3.2                    | 2.7                                             | 2.0                                              | 5.9                                              | 4.0                                              | 5.7                                         | 6.7                                          | 6.8                                          | 6.9                                          | 3.1                              | 0.045                                             | 13.5                    | 0.50                      | 0.6                        | 0.59                       | 0.40                       |
| (C15:0)         |                                     |                        | 0.46                   | 0.32                                            | 0.22                                             | 0.16                                             | 0.12                                             | 0.24                                        | 0.27                                         | 0.25                                         | 0.20                                         | 0.57                             | 0.012                                             |                         |                           |                            |                            |                            |
| (C16:0)         | 10.48                               | 13.5                   | 18.1                   | 16.6                                            | 15.9                                             | 12.1                                             | 10.8                                             | 14.4                                        | 14.3                                         | 12.7                                         | 12.0                                         | 21                               | 0.83                                              | 8.2                     | 24.41                     | 32.31                      | 27.45                      | 27.36                      |
| (C17:0)         |                                     |                        | 0.51                   | 0.42                                            | 0.35                                             | 0.21                                             | 0.16                                             | 0.27                                        | 0.20                                         | 0.20                                         | 0.24                                         | 0.80                             | 0.014                                             |                         |                           |                            |                            |                            |
| (C18:0)         | 2.78                                | 2.1                    | 10.8                   | 17.1                                            | 12.6                                             | 4.7                                              | 5.8                                              | 21.4                                        | 12.9                                         | 11.0                                         | 9.0                                          | 8.9                              | 0.32                                              |                         | 1.5                       | 1.57                       | 1.12                       | 1.09                       |
| (C20:0)         |                                     |                        | 11.0                   | 6.9                                             | 2.7                                              | 1.2                                              | 1.3                                              | 4.2                                         | 2.9                                          | 2.6                                          | 2.4                                          | 2.42                             | 0.033                                             |                         |                           |                            |                            |                            |
| (C21:0)         |                                     |                        |                        |                                                 |                                                  |                                                  |                                                  |                                             |                                              |                                              |                                              | 0.17                             | Nd                                                |                         |                           |                            |                            |                            |
| (C22:0)         |                                     |                        | 16.0                   | 8.9                                             | 2.8                                              | 1.3                                              | 1.1                                              | 5.0                                         | 3.3                                          | 3.0                                          | 2.8                                          | 2.68                             | 0.027                                             |                         |                           |                            |                            |                            |
| SFA             | 69.35                               | 69.90                  | 74.42                  | 62.72                                           | 45.09                                            | 46.32                                            | 42.63                                            | 80.38                                       | 74.1                                         | 67.69                                        | 62.59                                        | 40.02                            | 1.31                                              | 87.00                   | 27.31                     | 35.11                      | 29.76                      | 29.33                      |
| (C16:1)         | 3.45 (n-7)                          | 2.4 (n-7)              | 4.7(n-7)               | 4.1(n-7)                                        | 5.2(n-7)                                         | 4.3(n-7)                                         | 5.0(n-7)                                         | 3.8(n-7)                                    | 4.6(n-7)                                     | 3.9(n-7)                                     | 3.6(n-7)                                     | 0.06 (n-9)<br>0.40 (n-7)         | 0.006 (n-9)<br>0.015 (n-7)                        | 2.7                     | 0.33                      | 0.20                       | 0.30                       | 0.30                       |
| (C18:1)         | 11.81 (n-9)                         | 12.0 (n-9)             | 9.0(n-9)<br>2.5 (n-7)  | 8.2(n-9)<br>1.5(n-7)                            | 11.3(n-9)<br>1.4(n-7)                            | 11.7(n-9)<br>0.9(n-7)                            | 12.9(n-9)<br>0.5(n-7)                            | 7.4(n-9)<br>1.6(n-7)                        | 10.2(n-9)<br>1.2(n-7)                        | 12.4(n-9)<br>1.2(n-7)                        | 13.9(n-9)<br>1.1(n-7)                        | 2.9 (n-9)<br>0.28 (n-7)          | 0.90 (n-9)<br>0.039 (n-7)                         | 8.3                     | 20.49 (n-9)<br>0.7 (n-11) | 13.04 (n-9)<br>0.54 (n-11) | 13.77 (n-9)<br>0.97 (n-11) | 13.48 (n-9)<br>0.96 (n-11) |
| (C20:1)         |                                     |                        | 0.02 (n-9)             | 0.15(n-9)                                       | 0.12(n-9)                                        | 0.01(n-9)                                        | 0.05(n-9)                                        | 0.04(n-9)                                   | 0.06(n-9)                                    | 0.04(n-9)                                    | 0.07(n-9)                                    | 0.65 (n-9)                       | 0.027 (n-9)                                       |                         | Nd                        | 0.16 (n-11)                | 0.29 (n-11)                | 0.27 (n-11)                |
| MUFA            | 15.26                               | 14.90                  | 16.22                  | 13.95                                           | 18.02                                            | 16.91                                            | 18.45                                            | 12.84                                       | 16.06                                        | 17.54                                        | 18.67                                        | 4.29                             | 0.99                                              | 11.00                   | 21.72                     | 14.15                      | 15.71                      | 15.33                      |
| (C18:2)         | 3.68 (n-6)                          | 9.9 (n-6)              | 6.2(n-6)               | 4.6(n-6)                                        | 4.9(n-6)                                         | 3.7(n-6)                                         | 3.9(n-6)                                         | 4.0(n-6)                                    | 4.8(n-6)                                     | 5.9(n-6)                                     | 6.8(n-6)                                     | 0.69 (n-6)                       | 2.32 (n-6)                                        | 2.0                     | 46.60 (n-6)               | 46.40 (n-6)                | 49.92 (n-6)                | 49.82 (n-6)                |
| (C18:3)         | 0.08 (n-3)                          | 0.1 (n-3)              | 0.4(n-6)<br>1.0 (n-3)  | 0.9(n-6)<br>0.9 (n-3)                           | 1.6(n-6)<br>1.1(n-3)                             | 1.6(n-6)<br>1.0(n-3)                             | 1.9(n-6)<br>1.1(n-3)                             | 0.1(n-6)<br>1.2(n-3)                        | 0.1(n-6)<br>2.3(n-3)                         | 0.2(n-6)<br>3.8(n-3)                         | 0.2(n-6)<br>5.3(n-3)                         |                                  | 0.48 (n-3)                                        |                         | Nd<br>4.21 (n-3)          | nd 4.26 (n-3)              | 0.08 (n-6)<br>4.34 (n-3)   | 0.06 (n-6)<br>5.18 (n-3)   |
| (C20:4)         |                                     |                        | 0.1 (n-6)              | 2.2 (n-6)                                       | 3.2(n-6)                                         | 3.6(n-6)                                         | 3.9(n-6)                                         | 0.4(n-6)                                    | 0.7(n-6)                                     | 1.4(n-6)                                     | 2.0(n-6)                                     |                                  |                                                   |                         |                           |                            |                            |                            |
| (C20:5)         |                                     |                        | 0.8 (n-3)              | 6.5(n-3)                                        | 10.6(n-3)                                        | 10.6(n-3)                                        | 11.7(n-3)                                        | 0.6(n-3)                                    | 1.2(n-3)                                     | 2.2(n-3)                                     | 3.0(n-3)                                     |                                  |                                                   |                         |                           |                            |                            |                            |
| (C22:6)         |                                     |                        | 0.7 (n-3)              | 8.3 (n-3)                                       | 15.6 (n-3)                                       | 16.7 (n-3)                                       | 15.2 (n-3)                                       | 0.5(n-3)                                    | 0.6(n-3)                                     | 1.2 (n-3)                                    | 1.4(n-3)                                     |                                  |                                                   |                         |                           |                            |                            |                            |
| PUFA            | 3.76                                | 10.00                  | 9.20                   | 23.40                                           | 37.00                                            | 37.2                                             | 37.8                                             | 6.8                                         | 9.7                                          | 14.7                                         | 18.7                                         | 0.69                             | 2.80                                              | 2.00                    | 50.96                     | 50.74                      | 54.53                      | 55.34                      |
| Omega 6         | 3.68                                | 9.9                    | 6.7                    | 7.7                                             | 9.7                                              | 8.9                                              | 9.7                                              | 4.5                                         | 5.6                                          | 7.5                                          | 9.00                                         | 0.69                             | 2.32                                              | 2.0                     | 46.60                     | 46.40                      | 50.00                      | 49.88                      |
| Omega 3         | 0.08                                | 0.1                    | 2.5                    | 15.7                                            | 27.3                                             | 28.3                                             | 28.1                                             | 2.3                                         | 4.1                                          | 7.2                                          | 9.7                                          |                                  | 0.48                                              |                         | 4.21                      | 4.26                       | 4.34                       | 5.18                       |
| n-6/n-3         | 46                                  | 99                     | 2.68                   | 0.49                                            | 0.35                                             | 0.31                                             | 0.34                                             | 1.96                                        | 1.37                                         | 1.04                                         | 0.93                                         |                                  | 4.83                                              |                         | 11.07                     | 10.89                      | 11.52                      | 9.63                       |
| Reference       | (St-Hilaire, Sheppard, et al. 2007) | (Surendra et al. 2016) | (Truzzi et al. 2020)   | (Truzzi et al. 2020)                            | (Truzzi et al. 2020)                             | (Truzzi et al. 2020)                             | (Truzzi et al. 2020)                             | (Truzzi et al. 2020)                        | (Truzzi et al. 2020)                         | (Truzzi et al. 2020)                         | (Truzzi et al. 2020)                         | (Vargas et al. 2018)             | (Vargas et al. 2018)                              | (Wong et al. 2019)      | (Danieli et al. 2019)     | (Danieli et al. 2019)      | (Danieli et al. 2019)      | (Danieli et al. 2019)      |

Table S1 - Cont.

| BSF Fatty acids | Substrate tested         |                          |                          |                                    |                         |                                                                                                    |                        |                              |                        |                        |                        |                        |                        |                                 |                                  |                                  |
|-----------------|--------------------------|--------------------------|--------------------------|------------------------------------|-------------------------|----------------------------------------------------------------------------------------------------|------------------------|------------------------------|------------------------|------------------------|------------------------|------------------------|------------------------|---------------------------------|----------------------------------|----------------------------------|
|                 | Cotton cake & Corn bran  | Chicken feed             | Fish waste & corn bran   | Wheat bran & rabbit feed (control) | 100% raw apricots       | 25% brewer's spent grain (dried), 12.5% feed mill by-products and 62.5% brewer's spent yeast (raw) | Brewer's by-product    | Quail manure 0%              | Quail manure 20%       | Quail manure 40%       | Quail manure 60%       | Quail manure 80%       | Quail manure 100%      | <i>Schizochy trium</i> waste 0% | <i>Schizochy trium</i> waste 10% | <i>Schizochy trium</i> waste 20% |
| (C10:0)         | 0.97                     | 0.83                     | 0.69                     | 0.57                               | 0.52                    | 1.36                                                                                               | 0.92                   | 1.28                         | 1.34                   | 1.32                   | 1.41                   | 1.3                    | 1.51                   | 1.58                            | 1.30                             | 1.19                             |
| (C12:0)         | 50.12                    | 43.93                    | 43.35                    | 50.83                              | 49.86                   | 55.39                                                                                              | 36.0                   | 41.96                        | 39.44                  | 40.50                  | 40.70                  | 35.92                  | 30.91                  | 46.36                           | 36.88                            | 34.14                            |
| (C13:0)         |                          |                          |                          |                                    |                         |                                                                                                    |                        |                              |                        |                        |                        |                        |                        |                                 |                                  |                                  |
| (C14:0)         | 8.82                     | 8.49                     | 9.13                     | 8.74                               | 8.34                    | 7.5                                                                                                | 7.83                   | 7.05                         | 6.09                   | 6.28                   | 6.16                   | 5.24                   | 5.28                   | 7.84                            | 6.06                             | 5.92                             |
| (C15:0)         |                          |                          |                          |                                    |                         |                                                                                                    | 0.21                   |                              |                        |                        |                        |                        |                        |                                 |                                  |                                  |
| (C16:0)         | 15.39                    | 13.71                    | 15.00                    | 11.92                              | 13.96                   | 11.99                                                                                              | 16.8                   | 12.59                        | 12.45                  | 11.91                  | 12.13                  | 10.33                  | 11.17                  | 12.20                           | 16.15                            | 18.18                            |
| (C17:0)         |                          |                          |                          | 0.18                               | 0.22                    | 0.38                                                                                               |                        |                              |                        |                        |                        |                        |                        |                                 |                                  |                                  |
| (C18:0)         | 1.8                      | 2.77                     | 3.09                     | 1.61                               | 1.89                    | 9.64                                                                                               | 2.28                   |                              |                        |                        |                        |                        |                        |                                 |                                  |                                  |
| (C19:0)         |                          |                          |                          |                                    |                         |                                                                                                    |                        |                              |                        |                        |                        |                        |                        |                                 |                                  |                                  |
| (C20:0)         |                          |                          |                          |                                    |                         |                                                                                                    | 0.11                   |                              |                        |                        |                        |                        |                        |                                 |                                  |                                  |
| (C22:0)         | 0.41                     | 0.00                     |                          |                                    |                         |                                                                                                    |                        |                              |                        |                        |                        |                        |                        |                                 |                                  |                                  |
| SFA             | 77.57                    | 69.73                    | 71.26                    | 73.85                              | 74.78                   | 84.26                                                                                              | 64.5                   | 64.36                        | 60.49                  | 61.28                  | 61.77                  | 54.04                  | 51.36                  | 69.63                           | 62.03                            | 61.22                            |
| (C14:1)         |                          |                          |                          |                                    |                         |                                                                                                    | 0.15                   | 0.50                         | 0.48                   | 0.50                   | 0.61                   | 1.00                   | 1.39                   | 0.53                            | 0.28                             | 0.17                             |
| (C15:1)         |                          |                          |                          |                                    |                         |                                                                                                    | 0.10                   |                              |                        |                        |                        |                        |                        |                                 |                                  |                                  |
| (C16:1)         | 3.85                     | 2.28                     | 2.79                     | 0.8 (n-9) / 1.71 (n-7)             | 0.46 (n-9) / 2.00 (n-7) | 0.19 (n-9) / 4.35 (n-7)                                                                            | 2.29                   | 5.82                         | 7.30                   | 8.82                   | 8.97                   | 9.88                   | 15.00                  | 5.56                            | 5.34                             | 5.70                             |
| (C17:1)         | 0.53                     | 0.15                     | 0.59                     |                                    |                         |                                                                                                    |                        |                              |                        |                        |                        |                        |                        |                                 |                                  |                                  |
| (C18:1)         | 10.62                    | 12.97                    | 14.81                    | 9.17                               | 11.35                   | 9.64                                                                                               | 9.38                   | 11.19                        | 12.03                  | 12.51                  | 13.79                  | 15.17                  | 16.49                  | 10.58                           | 12.15                            | 11.10                            |
| (C20:1)         |                          |                          |                          |                                    |                         |                                                                                                    | 0.19                   | 0.18                         | 0.26                   | 0.29                   | 0.33                   | 0.39                   | 0.00                   |                                 |                                  |                                  |
| MUFA            | 15.01                    | 15.41                    | 18.20                    | 11.68                              | 13.81                   | 14.18                                                                                              | 12.3                   | 17.7                         | 21.07                  | 21.12                  | 21.70                  | 26.43                  | 32.89                  | 16.68                           | 17.78                            | 16.98                            |
| (C18:2)         | 7.13 (n-6)               | 13.58 (n-6)              | 8.29                     | 12.7                               | 10.47                   | 4.44                                                                                               | 18.1                   | 12.36                        | 10.45                  | 8.99                   | 9.05                   | 7.15                   | 2.99                   | 12.45                           | 14.85                            | 14.35                            |
| (C18:3)         | 0.12                     | 1.19                     | 0.23                     | 1.77                               | 0.93                    | 1.85                                                                                               | 1.48                   | 1.08                         | 0.81                   | 0.73                   | 0.62                   | 0.39                   | 0.19                   | 0.99                            | 1.14                             | 1.02                             |
| (C18:4)         |                          |                          |                          |                                    |                         |                                                                                                    |                        |                              |                        |                        |                        |                        |                        |                                 |                                  |                                  |
| (C20:3)         | 0.06                     | 0.04                     | 0.23                     |                                    |                         |                                                                                                    |                        |                              |                        |                        |                        |                        |                        |                                 |                                  |                                  |
| (C20:4)         | 0.02 (n-6)               | 0.05                     | 0.03                     |                                    |                         | 0.17                                                                                               |                        |                              |                        |                        |                        |                        |                        |                                 |                                  |                                  |
| (C20:5)         |                          |                          | 1.38                     |                                    |                         | 0.57                                                                                               |                        |                              |                        |                        |                        |                        |                        | 0.23                            | 0.79                             | 1.18                             |
| (C22:5)         |                          |                          |                          |                                    |                         |                                                                                                    |                        |                              |                        |                        |                        |                        |                        |                                 |                                  |                                  |
| (C22:6)         |                          |                          | 0.37                     |                                    |                         |                                                                                                    |                        |                              |                        |                        |                        |                        |                        | 0.00                            | 3.4                              | 5.23                             |
| PUFA            | 7.90                     | 14.86                    | 10.53                    | 14.47                              | 11.4                    | 7.03                                                                                               | 19.6                   | 13.43                        | 11.25                  | 9.71                   | 9.67                   | 7.55                   | 3.19                   | 13.63                           | 20.18                            | 21.79                            |
| Omega 6         | 7.14                     | 13.62                    | 8.32                     | 12.7                               | 10.47                   | 4.44                                                                                               | 18.1                   | 12.36                        | 10.45                  | 8.99                   | 9.05                   | 7.15                   | 2.99                   | 12.45                           | 14.85                            | 14.35                            |
| Omega 3         | 0.7                      | 1.23                     | 2.21                     | 1.77                               | 0.93                    | 2.59                                                                                               | 1.48                   | 1.08                         | 0.81                   | 0.73                   | 0.62                   | 0.39                   | 0.19                   | 1.23                            | 5.33                             | 7.44                             |
| n-6/n-3         | 10.2                     | 11.07                    | 3.76                     | 7.17                               | 11.26                   | 1.71                                                                                               | 12.23                  | 11.44                        | 12.90                  | 12.31                  | 14.60                  | 18.33                  | 15.74                  | 10.12                           | 2.79                             | 1.93                             |
| Reference       | (Agbohessou et al. 2021) | (Agbohessou et al. 2021) | (Agbohessou et al. 2021) | (Boukid et al. 2021)               | (Boukid et al. 2021)    | (Boukid et al. 2021)                                                                               | (Campbell et al. 2020) | (El-Dakar, Ramzy, & Ji 2021) | (El-Dakar et al. 2020)          | (El-Dakar et al. 2020)           | (El-Dakar et al. 2020)           |

Table S1 - Cont.

| BSF Fatty acids | Substrate tested                |                                 |                                 |                                       |                                       |                                       |                                       |                          |                          |                          |                          |                        |                        |                            |                            |                            |
|-----------------|---------------------------------|---------------------------------|---------------------------------|---------------------------------------|---------------------------------------|---------------------------------------|---------------------------------------|--------------------------|--------------------------|--------------------------|--------------------------|------------------------|------------------------|----------------------------|----------------------------|----------------------------|
|                 | <i>Schizochytrium</i> waste 30% | <i>Schizochytrium</i> waste 40% | <i>Schizochytrium</i> waste 50% | Poultry manure                        | Quail manure                          | Goat manure                           | Pig manure                            | Dry solid digestate 0.25 | Dry solid digestate 0.50 | Dry solid digestate 0.75 | Dry solid digestate 1.00 | Wheat bran             | Brewer's spent grain   | Brewery by-products        | Cow's milk whey            | Grape stalks               |
| (C10:0)         | 1.03                            | 1.04                            | 0.75                            | 0.96                                  | 1.69                                  | 1.53                                  | 0.97                                  |                          |                          |                          |                          | 1.5                    | 0.9                    | 1.4                        | 1.3                        | 1.4                        |
| (C12:0)         | 32.33                           | 35.65                           | 30.62                           | 30.89                                 | 52.30                                 | 38.24                                 | 23.18                                 | 25.3                     | 27.7                     | 29.1                     | 29.0                     | 54.5                   | 31.6                   | 48.5                       | 53.4                       | 17.0                       |
| (C13:0)         |                                 |                                 |                                 |                                       |                                       |                                       |                                       |                          |                          |                          |                          |                        |                        |                            |                            |                            |
| (C14:0)         | 5.90                            | 6.38                            | 6.57                            | 5.10                                  | 6.90                                  | 6.33                                  | 4.69                                  | 6.1                      | 5.9                      | 9.5                      | 9.5                      | 8.3                    | 5.0                    | 5.6                        | 7.8                        | 2.9                        |
| (C15:0)         |                                 |                                 |                                 |                                       |                                       |                                       |                                       | 0.9                      | 0.3                      | 0.6                      | 0.7                      |                        |                        |                            |                            |                            |
| (C16:0)         | 21.68                           | 21.24                           | 24.69                           | 19.06                                 | 7.55                                  | 11.66                                 | 19.24                                 | 11.0                     | 9.8                      | 12.8                     | 12.6                     | 11.0                   | 19.6                   | 10.7                       | 8.8                        | 12.8                       |
| (C17:0)         |                                 |                                 |                                 |                                       |                                       |                                       |                                       | 1.4                      | 0.5                      | 1.0                      | 1.0                      |                        |                        |                            |                            |                            |
| (C18:0)         | 1.46                            | 1.22                            | 1.57                            | 1.0                                   | 1.26                                  | 2.60                                  | 3.39                                  | 2.0                      | 1.7                      | 3.2                      | 3.3                      | 1.0                    | 1.3                    | 1.1                        | 1.7                        | 3.3                        |
| (C19:0)         |                                 |                                 |                                 |                                       |                                       |                                       |                                       |                          |                          |                          |                          |                        |                        |                            |                            |                            |
| (C20:0)         |                                 |                                 |                                 |                                       |                                       |                                       |                                       |                          |                          |                          |                          |                        |                        |                            |                            |                            |
| (C22:0)         |                                 |                                 |                                 |                                       |                                       |                                       |                                       |                          |                          |                          |                          |                        |                        |                            |                            |                            |
| SFA             | 62.42                           | 65.55                           | 64.22                           | 57.08                                 | 69.70                                 | 60.37                                 | 51.47                                 | 46.6                     | 45.9                     | 56.1                     | 56.0                     | 76.3                   | 58.4                   | 67.3                       | 73.0                       | 37.4                       |
| (C14:1)         | 0.22                            | 0.25                            | 0.00                            | 0.37                                  | 1.32                                  | 0.75                                  | 0.46                                  |                          |                          |                          |                          |                        |                        |                            |                            |                            |
| (C15:1)         |                                 |                                 |                                 |                                       |                                       |                                       |                                       |                          |                          |                          |                          |                        |                        |                            |                            |                            |
| (C16:1)         | 5.92                            | 4.94                            | 5.31                            | 9.15                                  | 9.80                                  | 9.60                                  | 11.54                                 | 11.1                     | 8.6                      | 9.1                      | 9.0                      | 3.5                    | 5.4                    | 1.9                        | 2.0                        | 0.5                        |
| (C17:1)         |                                 |                                 |                                 |                                       |                                       |                                       |                                       |                          |                          |                          |                          |                        |                        |                            |                            |                            |
| (C18:1)         | 9.24                            | 7.50                            | 8.22                            | 15.09                                 | 9.26                                  | 13.98                                 | 23.98                                 | 38.9                     | 41.1                     | 32.8                     | 33.0                     | 7.9                    | 8.2                    | 8.2                        | 11.4                       | 22.9                       |
| (C20:1)         |                                 |                                 |                                 | 0.24                                  |                                       |                                       |                                       |                          |                          |                          |                          |                        |                        |                            |                            |                            |
| MUFA            | 15.39                           | 12.70                           | 13.53                           | 24.85                                 | 20.39                                 | 24.33                                 | 35.52                                 | 50.0                     | 49.7                     | 41.9                     | 42.0                     | 11.4                   | 13.6                   | 10.1                       | 13.4                       | 23.4                       |
| (C18:2)         | 13.88                           | 12.36                           | 10.43                           | 10.19                                 | 1.37                                  | 2.14                                  | 1.96                                  | 3.4                      | 4.4                      | 2.0                      | 2.1                      | 5.2                    | 14.3                   | 20.5                       | 12.9                       | 31.8                       |
| (C18:3)         | 0.82                            | 0.92                            | 0.84                            | 0.17                                  |                                       | 0.04                                  | 0.04                                  |                          |                          |                          |                          |                        |                        | 2.1                        | 0.8                        | 2.9                        |
| (C18:4)         |                                 |                                 |                                 |                                       |                                       |                                       |                                       |                          |                          |                          |                          |                        |                        |                            |                            |                            |
| (C20:3)         |                                 |                                 |                                 |                                       |                                       |                                       |                                       |                          |                          |                          |                          |                        |                        |                            |                            |                            |
| (C20:4)         |                                 |                                 |                                 |                                       |                                       |                                       |                                       |                          |                          |                          |                          |                        |                        |                            |                            |                            |
| (C20:5)         | 1.61                            | 1.52                            | 1.58                            |                                       |                                       |                                       |                                       |                          |                          |                          |                          |                        |                        |                            |                            |                            |
| (C22:5)         |                                 |                                 |                                 |                                       |                                       |                                       |                                       |                          |                          |                          |                          |                        |                        |                            |                            |                            |
| (C22:6)         | 5.85                            | 6.92                            | 9.75                            |                                       |                                       |                                       |                                       |                          |                          |                          |                          |                        |                        |                            |                            |                            |
| PUFA            | 22.18                           | 21.74                           | 22.23                           | 10.37                                 | 1.37                                  | 2.19                                  | 2.00                                  | 3.4                      | 4.4                      | 2.0                      | 2.1                      | 5.2                    | 14.3                   | 22.6                       | 13.8                       | 34.7                       |
| Omega 6         | 13.88                           | 12.36                           | 10.43                           | 10.19                                 | 1.37                                  | 2.14                                  | 1.96                                  | 3.4                      | 4.4                      | 2.0                      | 2.1                      | 5.2                    | 14.3                   | 20.5                       | 12.9                       | 31.8                       |
| Omega 3         | 8.29                            | 9.38                            | 11.80                           | 0.17                                  |                                       | 0.04                                  | 0.04                                  |                          |                          |                          |                          |                        |                        | 2.1                        | 0.8                        | 2.9                        |
| n-6/n-3         | 1.67                            | 1.32                            | 0.88                            | 59.94                                 |                                       | 53.5                                  | 49                                    |                          |                          |                          |                          |                        |                        | 9.8                        | 16.1                       | 11.0                       |
| Reference       | (El-Dakar et al. 2020)          | (El-Dakar et al. 2020)          | (El-Dakar et al. 2020)          | (El-Dakar, Ramzy, Plath, et al. 2021) | (Elsayed et al. 2020)    | (Grossule et al. 2019) | (Grossule et al. 2019) | (Hadj Saadoun et al. 2020) | (Hadj Saadoun et al. 2020) | (Hadj Saadoun et al. 2020) |



Table S1 - Cont.

[illegible]

Table S1 - Cont.

| BSF Fatty acids | Substrate tested  |                     |                     |                     |                     |                     |                     |                     |                      |                      |                       |                       |                                                      |                                                      |                                                      |                                                      |
|-----------------|-------------------|---------------------|---------------------|---------------------|---------------------|---------------------|---------------------|---------------------|----------------------|----------------------|-----------------------|-----------------------|------------------------------------------------------|------------------------------------------------------|------------------------------------------------------|------------------------------------------------------|
|                 | Flax cake 100%    | Wheat Bran          | Flaxseed 20%        | Flaxseed 10%        | Rapeseed 20%        | Chia 20%            | Chia 10%            | Hemp 20%            | Fruit waste          | Foods waste          | Food waste            | Bacterial cell        | Dewater sewage sludge and palm kernel expeller (5:0) | Dewater sewage sludge and palm kernel expeller (4:1) | Dewater sewage sludge and palm kernel expeller (3:2) | Dewater sewage sludge and palm kernel expeller (2:3) |
| (C10:0)         | 1.1               | 5.5                 | 2.1                 | 2.6                 | 2.4                 | 1.4                 | 4.0                 | 1.7                 | 1.0                  | 1.3                  | 1.0                   | 1.6                   | 0.9                                                  | 5.6                                                  | 4.5                                                  | 18.9                                                 |
| (C12:0)         | 40.4              | 62.1                | 55.4                | 45.0                | 53.0                | 36.5                | 52.5                | 33.4                | 67.8                 | 55.5                 | 37.0                  | 48.7                  | 19.6                                                 | 24.3                                                 | 53.4                                                 | 21.4                                                 |
| (C13:0)         |                   |                     |                     |                     |                     |                     |                     |                     |                      |                      |                       |                       |                                                      |                                                      |                                                      |                                                      |
| (C14:0)         | 5.5               | 7.5                 | 8.8                 | 7.2                 | 8.3                 | 7.1                 | 6.7                 | 5.7                 | 8.6                  | 10.1                 | 8.0                   | 14.1                  | 10.3                                                 | 16.3                                                 | 12.5                                                 | 6.6                                                  |
| (C15:0)         | 0.1               | 0.1                 | 0.2                 | 0.2                 | 0.3                 | 0.2                 | 0.2                 | 0.2                 | 0.1                  | 0.1                  |                       |                       |                                                      |                                                      |                                                      |                                                      |
| (C16:0)         | 7.2               | 9.4                 | 9.4                 | 11.5                | 10.8                | 11.9                | 5.8                 | 10.5                | 9.8                  | 12.5                 | 15.3                  | 9.8                   | 15.3                                                 | 10.2                                                 | 9.9                                                  | 16.1                                                 |
| (C17:0)         | 0.2               | 0.1                 | 0.2                 | 0.3                 | 0.2                 | 0.2                 | 0.2                 | 0.2                 |                      | 0.1                  |                       |                       |                                                      |                                                      |                                                      |                                                      |
| (C18:0)         | 1.5               | 1.5                 | 1.2                 | 2.1                 | 1.2                 | 2.3                 | 1.7                 | 2.6                 | 0.7                  | 1.7                  | 1.6                   | 1.2                   |                                                      | 2.6                                                  | 1.2                                                  | 8.7                                                  |
| (C19:0)         |                   |                     |                     |                     |                     |                     |                     |                     |                      |                      |                       |                       |                                                      |                                                      |                                                      |                                                      |
| (C20:0)         |                   | 0.5                 | 2.4                 | 1.8                 | 1.9                 | 2.4                 | 0.9                 | 4.8                 |                      | 0.5                  |                       |                       |                                                      |                                                      |                                                      |                                                      |
| (C22:0)         |                   |                     |                     |                     |                     |                     |                     |                     |                      |                      |                       |                       |                                                      |                                                      |                                                      |                                                      |
| SFA             | 56.1              | 86.7                | 79.8                | 70.8                | 78.1                | 62.1                | 72.0                | 59.1                | 88.0                 | 81.8                 | 62.9                  | 75.4                  | 46.1                                                 | 59.0                                                 | 81.5                                                 | 71.7                                                 |
| (C14:1)         | 0.3               |                     |                     |                     |                     |                     |                     |                     | 0.1                  | 0.5                  |                       |                       | 8.9                                                  | 7.2                                                  | 2.8                                                  | 14.1                                                 |
| (C15:1)         | 0.2               | 0.4                 | 0.4                 | 0.6                 | 0.5                 | 0.4                 | 0.5                 | 0.4                 |                      |                      |                       |                       |                                                      |                                                      |                                                      |                                                      |
| (C16:1)         | 1.0               | 2.1                 | 2.3                 | 2.3                 | 2.7                 | 2.0                 | 1.9                 | 1.6                 | 2.3                  | 2.4                  | 2.6                   | 4.2                   | 12.8                                                 | 1.4                                                  | 4.4                                                  | 6.3                                                  |
| (C17:1)         | 0.2               |                     |                     |                     |                     |                     |                     |                     |                      | 0.1                  |                       |                       |                                                      |                                                      |                                                      |                                                      |
| (C18:1)         | 11.7              | 4.5                 | 5.7                 | 7.7                 | 10.8                | 6.0                 | 4.6                 | 7.2                 | 4.1                  | 10.0                 | 20.6                  | 13.5                  | 24.4                                                 | 20.3                                                 | 9.2                                                  | 5.0                                                  |
| (C20:1)         |                   | 0.1                 | 0.2                 | 0.2                 | 0.2                 | 0.2                 | 0.1                 | 0.4                 |                      | 0.1                  |                       |                       |                                                      |                                                      |                                                      |                                                      |
| MUFA            | 13.2              | 7.9                 | 9.0                 | 12.4                | 14.6                | 8.9                 | 7.8                 | 9.9                 | 6.5                  | 13.1                 | 23.2                  | 17.7                  | 46.1                                                 | 28.9                                                 | 16.4                                                 | 25.4                                                 |
| (C18:2)         | 6.5               | 4.8                 | 5.0                 | 7.1                 | 6.4                 | 9.7                 | 7.7                 | 24.0                | 1.5                  |                      | 10.5                  | 5.17                  | 7.9                                                  | 12.2                                                 | 2.1                                                  | 2.9                                                  |
| (C18:3)         | 15.3              | 0.5                 | 5.8                 | 9.6                 | 0.7                 | 18.9                | 12.3                | 6.8                 | 1.1                  | 0.1                  | 0.4                   |                       |                                                      |                                                      |                                                      |                                                      |
| (C18:4)         |                   |                     |                     |                     |                     |                     |                     |                     |                      |                      |                       |                       |                                                      |                                                      |                                                      |                                                      |
| (C20:3)         |                   |                     | 0.1                 |                     | 0.1                 | 0.1                 |                     |                     |                      | 0.1                  |                       |                       |                                                      |                                                      |                                                      |                                                      |
| (C20:4)         |                   |                     |                     |                     |                     |                     |                     |                     |                      |                      |                       |                       |                                                      |                                                      |                                                      |                                                      |
| (C20:5)         |                   |                     | 0.1                 |                     | 0.1                 | 0.1                 |                     |                     |                      |                      |                       |                       |                                                      |                                                      |                                                      |                                                      |
| (C22:5)         |                   |                     |                     |                     |                     |                     |                     |                     |                      |                      |                       |                       |                                                      |                                                      |                                                      |                                                      |
| (C22:6)         |                   |                     |                     |                     |                     |                     |                     |                     |                      |                      |                       |                       |                                                      |                                                      |                                                      |                                                      |
| PUFA            | 21.8              | 5.3                 | 11.2                | 16.8                | 7.3                 | 29.0                | 20.1                | 30.9                | 2.6                  | 0.2                  | 10.9                  | 5.17                  | 7.9                                                  | 12.2                                                 | 2.1                                                  | 2.9                                                  |
| Omega 6         | 6.5               |                     |                     |                     |                     |                     |                     |                     |                      |                      | 10.5                  | 5.17                  | 7.9                                                  | 12.2                                                 | 2.1                                                  | 2.9                                                  |
| Omega 3         | 15.3              |                     |                     |                     |                     |                     |                     |                     |                      |                      | 0.4                   |                       |                                                      |                                                      |                                                      |                                                      |
| n-6/n-3         | 0.4               | 9.9                 | 0.9                 | 0.7                 | 7.1                 | 0.5                 | 0.6                 | 3.5                 |                      |                      | 26.2                  |                       |                                                      |                                                      |                                                      |                                                      |
| Reference       | (Hoc et al. 2021) | (Lawal et al. 2021) | (Leong & Kutty 2020) | (Leong & Kutty 2020) | (Mohamad et al. 2020) | (Mohamad et al. 2020) | (Raksasat et al. 2021)                               |

Table S1 - Cont.

[illegible]

**Table S2:** Dataset used on MetaboAnalyst to perform the statistical analysis.

| <i>Samples</i> | <i>Lables</i> | <i>ALA</i> | <i>EPA</i> | <i>DHA</i> | <i>PUFA</i> | <i>SFA</i> |
|----------------|---------------|------------|------------|------------|-------------|------------|
| <i>CRT1</i>    | Control       | 0.44       | 0.07       | 0          | 12.6        | 68.9       |
| <i>CTR2</i>    | Control       | 0.19       | 1          | 0          | 6.99        | 72         |
| <i>CRT2</i>    | Control       | 4.5        | 0          | 0          | 57          | 18.3       |
| <i>CTR3</i>    | Control       | 0.2        | 0          | 0          | 3.4         | 93.9       |
| <i>CRT3</i>    | Control       | 9.7        | 0          | 0          | 20.3        | 63.5       |
| <i>CTR4</i>    | Control       | 0.5        | 0          | 0          | 10.1        | 74.4       |
| <i>CRT4</i>    | Control       | 0.6        | 0          | 0          | 10          | 74.2       |
| <i>CTR5</i>    | Control       | 0          | 0          | 0          | 13.57       | 63.33      |
| <i>CRT5</i>    | Control       | 0.7        | 0.06       | 0.01       | 12.34       | 77.4       |
| <i>CTR6</i>    | Control       | 1.08       | 0          | 0          | 13.43       | 64.36      |
| <i>CRT6</i>    | Control       | 0.99       | 0.23       | 0          | 13.63       | 69.63      |
| <i>CTR7</i>    | Control       | 1.2        | 0          | 0          | 14.9        | 69.73      |
| <i>CER1</i>    | Cereal        | 0          | 0          | 0          | 2.9         | 71.7       |
| <i>CER2</i>    | Cereal        | 0          | 0          | 0          | 10.3        | 58         |
| <i>CER3</i>    | Cereal        | 0          | 0          | 0          | 17.8        | 49.2       |
| <i>CER4</i>    | Cereal        | 0.5        | 0          | 0          | 5.3         | 86.7       |
| <i>CER5</i>    | Cereal        | 5.8        | 0.1        | 0          | 11.2        | 79.8       |
| <i>CER6</i>    | Cereal        | 9.6        | 0          | 0          | 16.8        | 70.8       |
| <i>CER7</i>    | Cereal        | 0.7        | 0.1        | 0          | 7.3         | 78.1       |
| <i>CER8</i>    | Cereal        | 18.9       | 0.1        | 0          | 29.0        | 62.1       |
| <i>CER9</i>    | Cereal        | 12.3       | 0          | 0          | 20.1        | 72.0       |
| <i>CER10</i>   | Cereal        | 6.8        | 0          | 0          | 30.9        | 59.1       |
| <i>CER11</i>   | Cereal        | 1.2        | 0          | 0          | 9.9         | 70.8       |
| <i>CER12</i>   | Cereal        | 1.4        | 0          | 0          | 10.8        | 69.8       |
| <i>CER13</i>   | Cereal        | 1.5        | 0          | 0          | 9.1         | 68.5       |
| <i>CER14</i>   | Cereal        | 1.3        | 0          | 0          | 7.3         | 66.3       |
| <i>CER15</i>   | Cereal        | 1.5        | 0          | 0          | 7.7         | 64.7       |
| <i>CER16</i>   | Cereal        | 2.4        | 0          | 0          | 11.3        | 56.3       |
| <i>CER17</i>   | Cereal        | 2.1        | 0          | 0          | 9.5         | 75.1       |
| <i>CER18</i>   | Cereal        | 3.1        | 0          | 0          | 12.3        | 72.9       |
| <i>CER19</i>   | Cereal        | 5.8        | 0          | 0          | 12.6        | 67.1       |
| <i>CER20</i>   | Cereal        | 6.5        | 0          | 0          | 13.7        | 66.1       |
| <i>CER21</i>   | Cereal        | 12.6       | 0          | 0          | 19.9        | 57.7       |
| <i>CER22</i>   | Cereal        | 15.3       | 0          | 0          | 21.8        | 56.1       |
| <i>CER23</i>   | Cereal        | 1          | 0          | 0          | 14.3        | 71.8       |
| <i>CER24</i>   | Cereal        | 0          | 0          | 0          | 5.2         | 76.3       |
| <i>CER25</i>   | Cereal        | 0.12       | 0          | 0          | 7.9         | 77.57      |
| <i>CER26</i>   | Cereal        | 0          | 0          | 0          | 67.6        | 12.5       |
| <i>CER27</i>   | Cereal        | 2.1        | 0          | 0          | 3.9         | 65.5       |
| <i>CER28</i>   | Cereal        | 0          | 0.15       | 0.01       | 0.16        | 74.52      |
| <i>CER29</i>   | Cereal        | 1.11       | 0          | 0          | 16.57       | 62.28      |
| <i>CER30</i>   | Cereal        | 1.35       | 0          | 0          | 25.37       | 45.41      |
| <i>CER31</i>   | Cereal        | 1.4        | 0.4        | 0          | 20.6        | 63.6       |
| <i>CER32</i>   | Cereal        | 1.2        | 0.4        | 0          | 19.9        | 60.2       |
| <i>CER33</i>   | Cereal        | 1          | 0.8        | 0.7        | 9.2         | 74.42      |
| <i>CER34</i>   | Cereal        | 0          | 0          | 0          | 0.69        | 40.02      |
| <i>CER35</i>   | Cereal        | 0.48       | 0          | 0          | 2.8         | 1.31       |
| <i>CER36</i>   | Cereal        | 4.21       | 0          | 0          | 50.96       | 27.31      |

|               |               |      |      |       |       |       |
|---------------|---------------|------|------|-------|-------|-------|
| <i>CER37</i>  | Cereal        | 4.26 | 0    | 0     | 50.74 | 35.11 |
| <i>CER38</i>  | Cereal        | 4.34 | 0    | 0     | 54.53 | 29.76 |
| <i>CER39</i>  | Cereal        | 5.18 | 0    | 0     | 55.34 | 29.33 |
| <i>CER40</i>  | Cereal        | 0.8  | 0    | 0     | 6.9   | 77.1  |
| <i>CER41</i>  | Cereal        | 1.6  | 0    | 0     | 9.3   | 75.6  |
| <i>CER42</i>  | Cereal        | 1.77 | 0    | 0     | 14.47 | 73.85 |
| <i>MIX 1</i>  | Miscellaneous | 0    | 0    | 0     | 5.17  | 75.4  |
| <i>Mix 2</i>  | Miscellaneous | 0.9  | 0    | 0     | 8.1   | 75.2  |
| <i>MIX 3</i>  | Miscellaneous | 1.1  | 0    | 0     | 18    | 47.9  |
| <i>MIX 4</i>  | Miscellaneous | 0    | 0    | 0     | 0     | 73.32 |
| <i>MIX 5</i>  | Miscellaneous | 0.4  | 0    | 0     | 18    | 63    |
| <i>MIX 6</i>  | Miscellaneous | 2.5  | 0    | 0     | 26    | 61.2  |
| <i>MIX 7</i>  | Miscellaneous | 1.5  | 0    | 0     | 18.8  | 59.7  |
| <i>MIX 8</i>  | Miscellaneous | 0.6  | 0    | 0     | 4.4   | 75.5  |
| <i>MIX 9</i>  | Miscellaneous | 0.8  | 0    | 0     | 9.2   | 66.9  |
| <i>MIX 10</i> | Miscellaneous | 1    | 0    | 0     | 7.1   | 76.3  |
| <i>MIX 11</i> | Miscellaneous | 0    | 0    | 0     | 12.34 | 72.19 |
| <i>MIX 12</i> | Miscellaneous | 0.9  | 0.4  | 0     | 16.4  | 65.6  |
| <i>MIX 13</i> | Miscellaneous | 0.8  | 0.1  | 0.02  | 9.42  | 64.8  |
| <i>MIX 14</i> | Miscellaneous | 1.48 | 0    | 0     | 19.6  | 64.5  |
| <i>MIX 15</i> | Miscellaneous | 1.85 | 0.57 | 0     | 7.03  | 84.26 |
| <i>MIX 16</i> | Miscellaneous | 0    | 0    | 0     | 3.4   | 50.0  |
| <i>MIX 17</i> | Miscellaneous | 0    | 0    | 0     | 4.4   | 49.7  |
| <i>MIX 18</i> | Miscellaneous | 0    | 0    | 0     | 2.0   | 41.9  |
| <i>MIX 19</i> | Miscellaneous | 0    | 0    | 0     | 2.1   | 42.0  |
| <i>MAN 1</i>  | Manure        | 0    | 0    | 0     | 7.9   | 46.1  |
| <i>MAN 2</i>  | Manure        | 0    | 0    | 0     | 12.2  | 59    |
| <i>MAN 3</i>  | Manure        | 0    | 0    | 0     | 2.1   | 81.5  |
| <i>MAN 4</i>  | Manure        | 0    | 0    | 0     | 14.3  | 58.4  |
| <i>MAN 5</i>  | Manure        | 2.1  | 0    | 0     | 22.6  | 67.3  |
| <i>MAN 6</i>  | Manure        | 0.8  | 0    | 0     | 13.8  | 73.0  |
| <i>MAN 7</i>  | Manure        | 0.19 | 0    | 0     | 3.19  | 51.36 |
| <i>MAN 8</i>  | Manure        | 0.39 | 0    | 0     | 7.55  | 54.04 |
| <i>MAN 9</i>  | Manure        | 0.62 | 0    | 0     | 9.67  | 61.77 |
| <i>MAN 10</i> | Manure        | 0.73 | 0    | 0     | 9.71  | 61.28 |
| <i>MAN 11</i> | Manure        | 0.81 | 0    | 0     | 11.25 | 60.49 |
| <i>MAN 12</i> | Manure        | 0    | 0    | 0     | 10    | 72    |
| <i>MAN 13</i> | Manure        | 1.7  | 0    | 0     | 14.7  | 62.8  |
| <i>MAN 14</i> | Manure        | 0    | 0    | 0     | 4.7   | 46.1  |
| <i>MAN 15</i> | Manure        | 0    | 0    | 0     | 3.8   | 69.4  |
| <i>MAN 16</i> | Manure        | 0    | 1.7  | 0     | 6.6   | 61.9  |
| <i>MAN 17</i> | Manure        | 0    | 0    | 0     | 3.5   | 65.5  |
| <i>MAN 18</i> | Manure        | 0    | 0    | 0     | 0.49  | 69.51 |
| <i>MAN 19</i> | Manure        | 0    | 0    | 0     | 6.9   | 55    |
| <i>MAN 20</i> | Manure        | 0.19 | 0.03 | 0.006 | 4.78  | 45.48 |
| <i>MAN 21</i> | Manure        | 0.08 | 0    | 0     | 3.76  | 69.35 |
| <i>MAN 22</i> | Manure        | 0.17 | 0    | 0     | 10.37 | 57.08 |
| <i>MAN 23</i> | Manure        | 0    | 0    | 0     | 1.37  | 69.7  |
| <i>MAN 24</i> | Manure        | 0.04 | 0    | 0     | 2.19  | 60.37 |

|         |            |      |      |      |       |       |
|---------|------------|------|------|------|-------|-------|
| MAN 25  | Manure     | 0.04 | 0    | 0    | 2.00  | 51.47 |
| SEAF 1  | Seafood    | 1.3  | 0    | 0    | 11.8  | 58.4  |
| SEAF 2  | Seafood    | 0.23 | 1.4  | 0.4  | 10.53 | 71.26 |
| SEAF 3  | Seafood    | 0.5  | 3.5  | 1.7  | 12.45 | 62.7  |
| SEAF 4  | Seafood    | 0.74 | 1.76 | 0.41 | 7.17  | 57.21 |
| SEAF 5  | Seafood    | 0.71 | 1.63 | 0.43 | 6.33  | 61.39 |
| SEAF 6  | Seafood    | 0.74 | 1.66 | 0.59 | 6.9   | 61.94 |
| SEAF 7  | Seafood    | 0.86 | 1.43 | 1.66 | 8.56  | 41.93 |
| SEAF 8  | Seafood    | 1.3  | 2    | 0.5  | 6.8   | 73.7  |
| SEAF 9  | Seafood    | 3.6  | 8.2  | 4.5  | 22.6  | 45.3  |
| SEAF 10 | Seafood    | 1.1  | 1.9  | 0.3  | 8.2   | 65.6  |
| SEAF 11 | Seafood    | 2.6  | 0.9  | 0.3  | 9.6   | 72.8  |
| SEAF 12 | Seafood    | 2.2  | 1.7  | 0.5  | 9.3   | 73.5  |
| SEAF 13 | Seafood    | 2.7  | 3    | 0.9  | 12    | 69.2  |
| SEAF 14 | Seafood    | 2.6  | 3.5  | 1.1  | 12.2  | 67.4  |
| SEAF 15 | Seafood    | 3.4  | 4.8  | 1.7  | 16.6  | 61.3  |
| WST 1   | Waste      | 1.8  | 0.5  | 0    | 12.4  | 65.2  |
| WST 2   | Waste      | 1.1  | 0.2  | 0.01 | 9.1   | 78.3  |
| WST 3   | Waste      | 0.1  | 0.1  | 0    | 0.2   | 81.8  |
| WST 4   | Waste      | 0.4  | 0    | 0    | 10.9  | 62.9  |
| WST 5   | Waste      | 0.1  | 0    | 0    | 10    | 69.9  |
| FRU 1   | Fruit      | 1.1  | 0    | 0    | 2.6   | 88.0  |
| FRU 2   | Fruit      | 1.3  | 0    | 0    | 38.7  | 42.5  |
| FRU 3   | Fruit      | 2.9  | 0    | 0    | 34.7  | 37.4  |
| FRU 4   | Fruit      | 0.93 | 0    | 0    | 7.03  | 84.26 |
| FRU 5   | Fruit      | 0.5  | 0    | 0    | 2.8   | 86    |
| FRU 6   | Fruit      | 0    | 0    | 0    | 0.52  | 47    |
| FRU 7   | Fruit      | 0.7  | 0    | 0    | 4.8   | 81.9  |
| FRU 8   | Fruit      | 0    | 0    | 0    | 2     | 87    |
| VEG 1   | Vegetables | 1.4  | 0.01 | 0.01 | 6.82  | 82.8  |
| VEG 2   | Vegetables | 5.8  | 0    | 0    | 16.2  | 56.5  |
| VEG 3   | Vegetables | 0    | 0    | 0    | 24.1  | 65    |
| VEG 4   | Vegetables | 1.7  | 0    | 0    | 8.8   | 78.9  |
| SEAW 1  | Seaweed    | 0.5  | 2.6  | 10.6 | 34.4  | 44.3  |
| SEAW 2  | Seaweed    | 3.2  | 6.6  | 0    | 37.8  | 22.7  |
| SEAW 3  | Seaweed    | 1.14 | 0.79 | 3.4  | 20.18 | 62.03 |
| SEAW 4  | Seaweed    | 1.02 | 1.18 | 5.23 | 21.79 | 61.22 |
| SEAW 5  | Seaweed    | 0.82 | 1.61 | 5.85 | 22.18 | 62.42 |
| SEAW 6  | Seaweed    | 0.92 | 1.52 | 6.92 | 21.74 | 65.55 |
| SEAW 7  | Seaweed    | 0.84 | 1.58 | 9.75 | 22.23 | 64.22 |
| SEAW 8  | Seaweed    | 0.9  | 6.5  | 8.3  | 23.4  | 62.72 |
| SEAW 9  | Seaweed    | 1.1  | 10.6 | 15.6 | 37    | 45.09 |
| SEAW 10 | Seaweed    | 1    | 10.6 | 16.7 | 37.2  | 46.32 |
| SEAW 11 | Seaweed    | 1.1  | 11.7 | 15.2 | 37.8  | 42.63 |
| SEAW 12 | Seaweed    | 1.2  | 0.6  | 0.5  | 6.8   | 80.38 |
| SEAW 13 | Seaweed    | 2.3  | 1.2  | 0.6  | 9.7   | 74.1  |
| SEAW 14 | Seaweed    | 3.8  | 2.2  | 1.2  | 14.7  | 67.69 |
| SEAW 15 | Seaweed    | 5.3  | 3    | 1.4  | 18.7  | 62.59 |

Table S3 - Top 10 peer-reviewed scientific journals publishing scientific research addressing the fatty acid profile of *Hermetia illucens* retrieved from WoS™ and Scopus. (Journals publishing 5 or less articles on this topic were grouped as Others)

| <i>Source title</i>                        | <i>Number of Publications</i> |
|--------------------------------------------|-------------------------------|
| <i>Aquaculture</i>                         | 33                            |
| <i>Animals</i>                             | 23                            |
| <i>Journal of Insects as Food and Feed</i> | 16                            |
| <i>Animal Feed Science and Technology</i>  | 12                            |
| <i>Scientific Reports</i>                  | 10                            |
| <i>Waste Management</i>                    | 10                            |
| <i>Journal of Cleaner Production</i>       | 9                             |
| <i>Renewable Energy</i>                    | 7                             |
| <i>Animal Feed Science and Technology</i>  | 6                             |
| <i>Others ≤5</i>                           | 266                           |

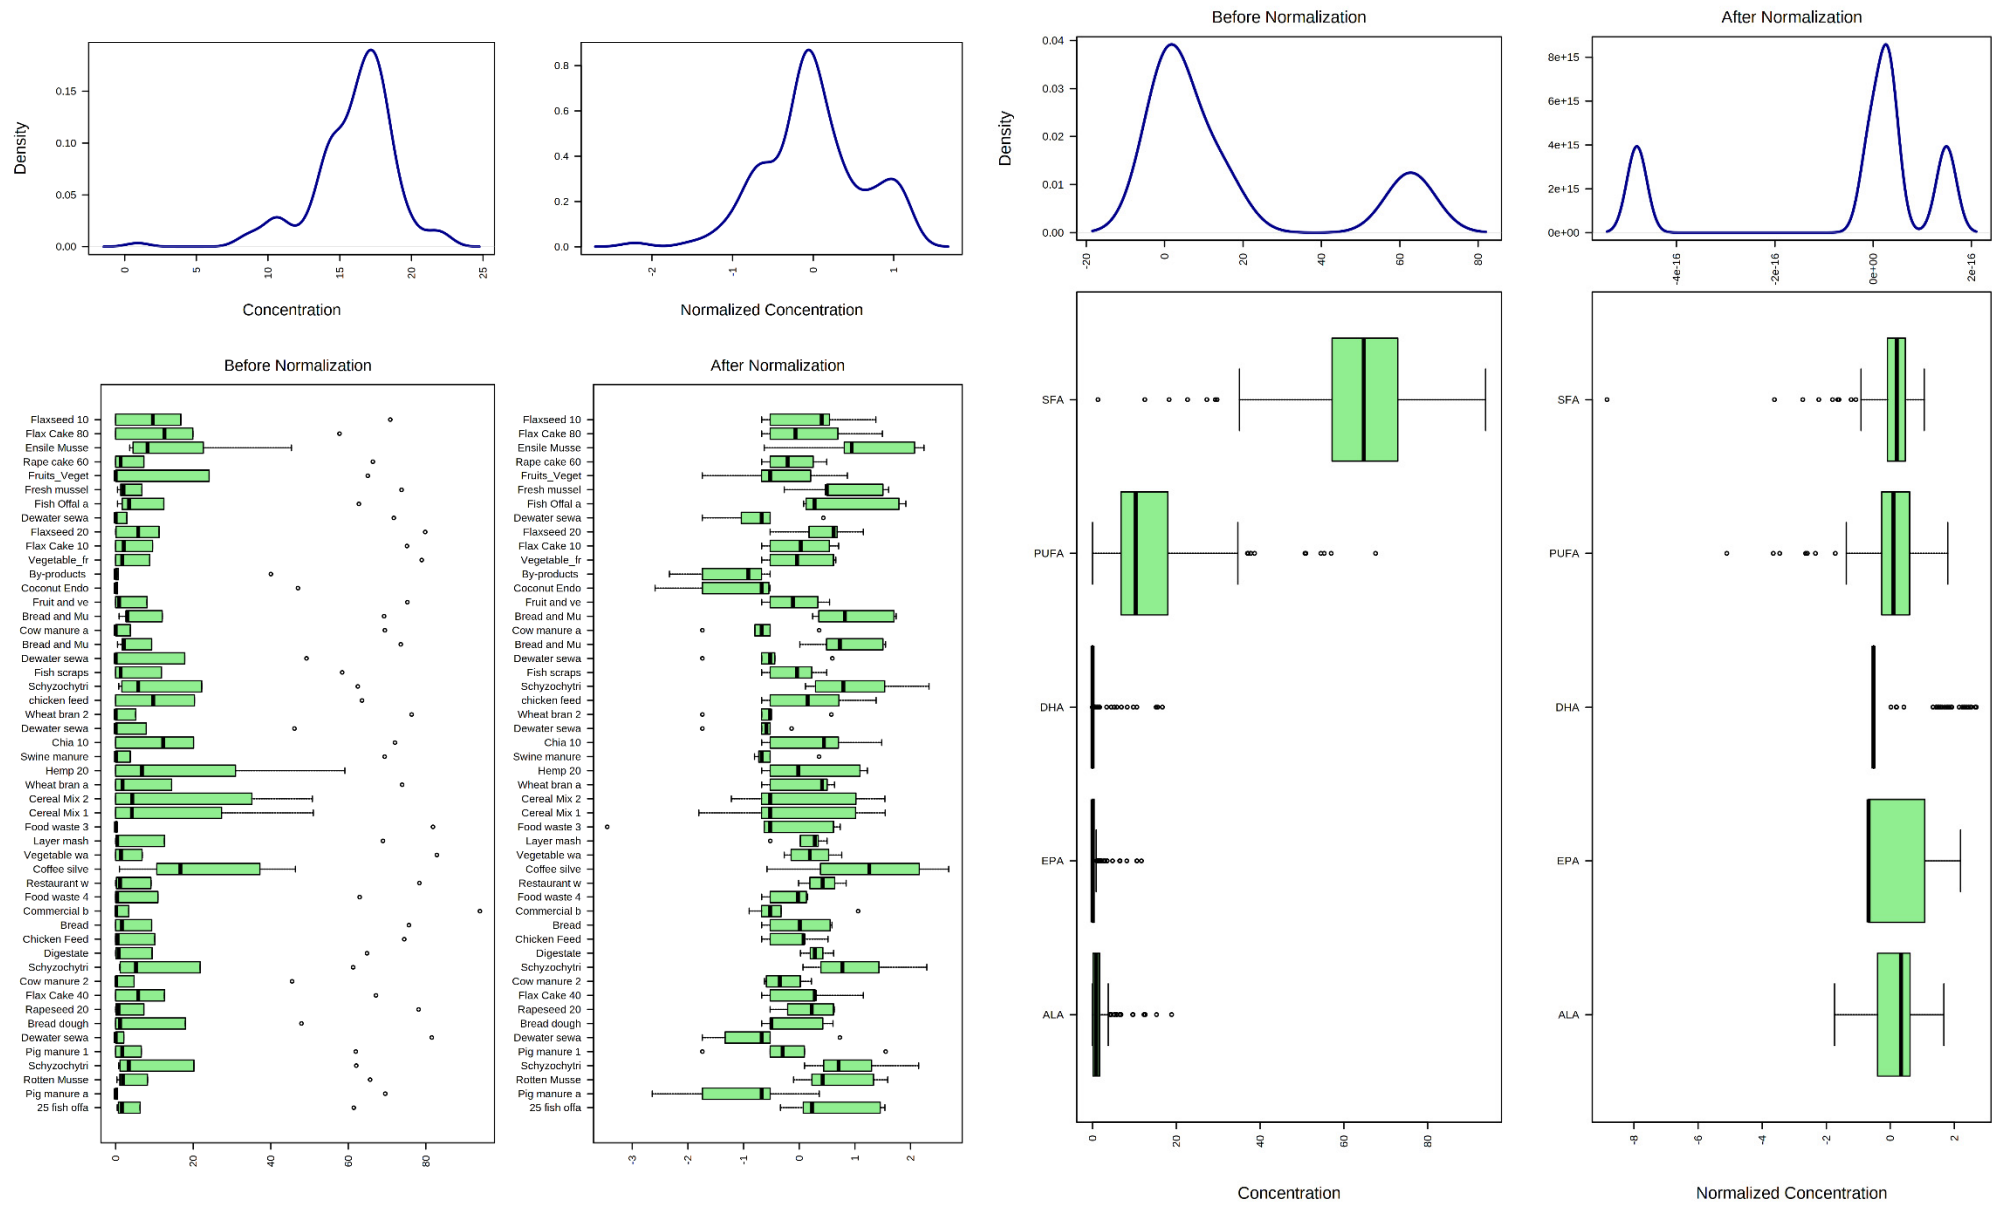

**Figure S1:** Box plots and kernel density plots before and after normalization. The boxplots show at most 50 features due to space limitations. The density plots are based on all samples. Data transformation: Log Normalization; Data scaling: Autoscaling.



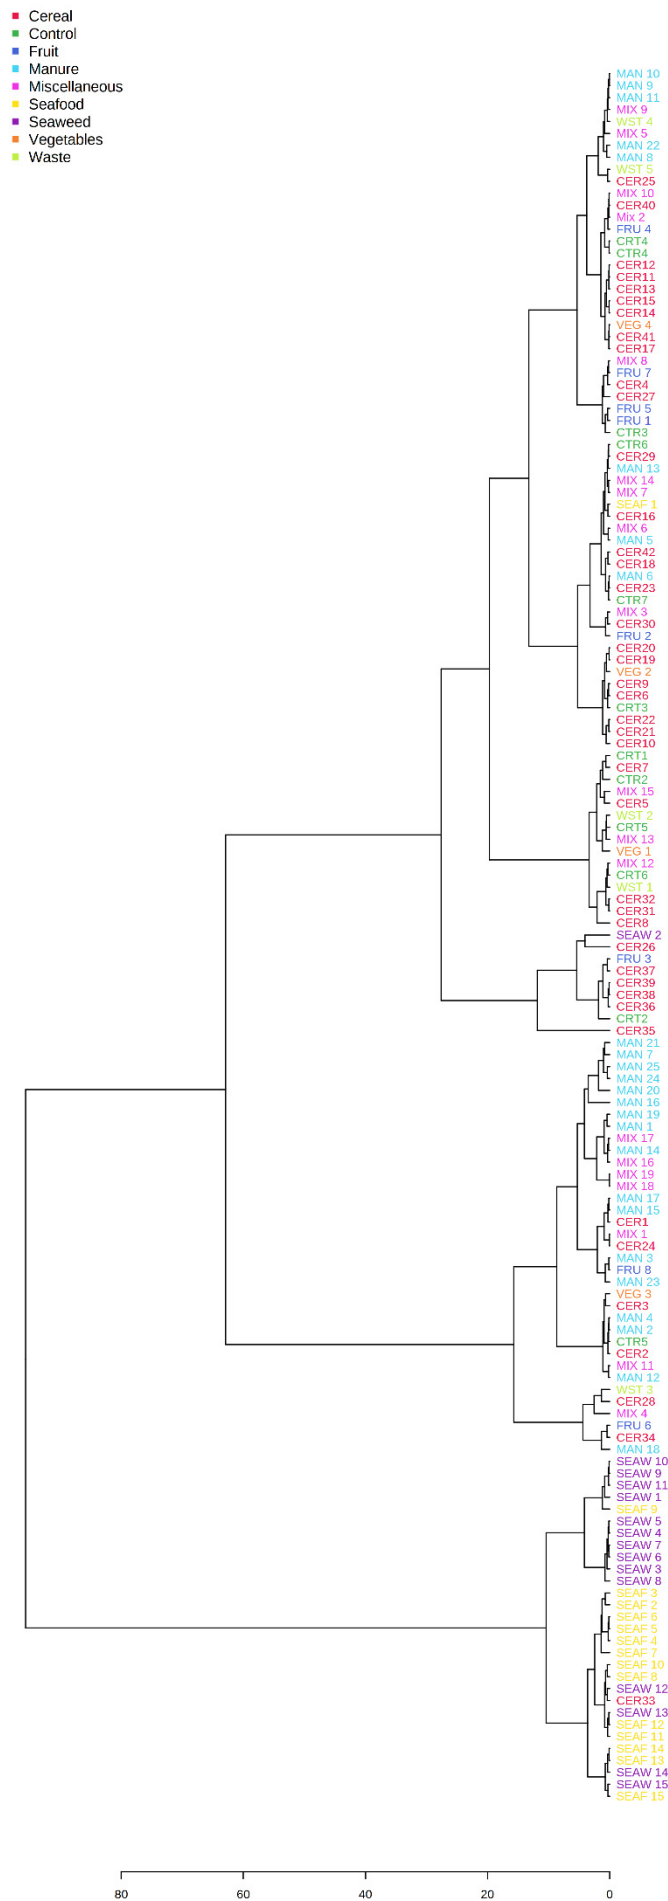

**Figure S2:** Hierarchical clustering of substrates shown as dendrogram (distance measures using Euclidean, and clustering algorithm using Ward's Distance).

## References

- Abduh MY, Nadia MH, Syaripudin, Manurung R, Putra RE. 2018. Factors affecting the bioconversion of Philippine tung seed by black soldier fly larvae for the production of protein and oil-rich biomass. *J Asia Pac Entomol* [Internet]. 21(3):836–842. <http://www.sciencedirect.com/science/article/pii/S1226861517300304>
- Agbohessou PS, Mandiki SNM, Goughé A, Megido RC, Hossain MS, De Jaeger P, Larondelle Y, Francis F, Lalèyè PA, Kestemont P. 2021. Total replacement of fish meal by enriched-fatty acid *Hermetia illucens* meal did not substantially affect growth parameters or innate immune status and improved whole body biochemical quality of Nile tilapia juveniles. *Aquac Nutr* [Internet]. 27(3):880–896. <https://doi.org/10.1111/anu.13232>
- Alifian MD, Sholikin MM, Evvyernie D, Nahrowi. 2019. Potential Fatty Acid Composition of *Hermetia illucens* Oil Reared on Different Substrates. *IOP Conf Ser Mater Sci Eng* [Internet]. 546:62002. <https://doi.org/10.1088/1757-899x/546/2/062002>
- Alipour N, Vinnerås B, Gouanvé F, Espuche E, Hedenqvist M. 2019. A Protein-Based Material from a New Approach Using Whole Defatted Larvae, and Its Interaction with Moisture. *Polymers (Basel)*. 11:287.
- Barroso FG, Sánchez-Muros M-J, Segura M, Morote E, Torres A, Ramos R, Guil J-L. 2017. Insects as food: Enrichment of larvae of *Hermetia illucens* with omega 3 fatty acids by means of dietary modifications. *J Food Compos Anal* [Internet]. 62:8–13. <http://www.sciencedirect.com/science/article/pii/S0889157517300996>
- Barroso FG, Sánchez-Muros MJ, Rincón MÁ, Rodríguez-Rodríguez M, Fabrikov D, Morote E, Guil-Guerrero JL. 2019. Production of n-3-rich insects by bioaccumulation of fishery waste. *Journal of Food Composition and Analysis* [Internet]. 82:103237. <http://www.sciencedirect.com/science/article/pii/S0889157518311451>
- Boukid F, Riudavets J, del Arco L, Castellari M. 2021. Impact of Diets Including Agro-Industrial By-Products on the Fatty Acid and Sterol Profiles of Larvae Biomass from *Ephestia kuehniella*, *Tenebrio molitor* and *Hermetia illucens*. *Insects*. 12(8).
- Campbell M, Ortuño J, Stratakis AC, Linton M, Corcionivoschi N, Elliott T, Koidis A, Theodoridou K. 2020. Impact of Thermal and High-Pressure Treatments on the Microbiological Quality and In Vitro Digestibility of Black Soldier Fly (*Hermetia illucens*) Larvae. *Animals*. 10(4).
- Cullere M, Woods MJ, van Emmenes L, Pieterse E, Hoffman LC, Dalle Zotte A. 2019. *Hermetia illucens* Larvae Reared on Different Substrates in Broiler Quail Diets: Effect on Physicochemical and Sensory Quality of the Quail Meat. *Animals* [Internet]. 9(8). <https://www.mdpi.com/2076-2615/9/8/525>
- Danieli, Lussiana, Gasco, Amici, Ronchi. 2019. The Effects of Diet Formulation on the Yield, Proximate Composition, and Fatty Acid Profile of the Black Soldier Fly (*Hermetia illucens* L.) Prepupae Intended for Animal Feed. *Animals*.
- El-Dakar MA, Ramzy RR, Ji H. 2021. Influence of substrate inclusion of quail manure on the growth performance, body composition, fatty acid and amino acid profiles of black soldier fly larvae (*Hermetia illucens*). *Sci Total Environ* [Internet]. 772:145528. <https://www.sciencedirect.com/science/article/pii/S0048969721005969>
- El-Dakar MA, Ramzy RR, Ji H, Plath M. 2020. Bioaccumulation of residual omega-3 fatty acids from industrial *Schizochytrium* microalgal waste using black soldier fly (*Hermetia illucens*) larvae. *J Clean Prod* [Internet]. 268:122288. <https://www.sciencedirect.com/science/article/pii/S0959652620323350>
- El-Dakar MA, Ramzy RR, Plath M, Ji H. 2021. Evaluating the impact of bird manure vs. mammal manure on *Hermetia illucens* larvae. *J Clean Prod* [Internet]. 278:123570. <https://www.sciencedirect.com/science/article/pii/S0959652620336155>

- Elsayed M, Ran Y, Ai P, Azab M, Mansour A, Jin K, Zhang Y, Abomohra AE-F. 2020. Innovative integrated approach of biofuel production from agricultural wastes by anaerobic digestion and black soldier fly larvae. *J Clean Prod* [Internet]. 263:121495. <https://www.sciencedirect.com/science/article/pii/S0959652620315420>
- Ewald N, Vidakovic A, Langeland M, Kiessling A, Sampels S, Lalander C. 2020. Fatty acid composition of black soldier fly larvae (*Hermetia illucens*) – Possibilities and limitations for modification through diet. *Waste Manag*. 102:40–47.
- Gao Z, Wang W, Lu X, Zhu F, Liu W, Wang X, Lei C. 2019. Bioconversion performance and life table of black soldier fly (*Hermetia illucens*) on fermented maize straw. *J Clean Prod* [Internet]. 230:974–980. <http://www.sciencedirect.com/science/article/pii/S095965261931594X>
- Grossule V, Vanin S, Lavagnolo MC. 2019. Potential treatment of leachate by *Hermetia illucens* (Diptera, Stratiomyidae) larvae: Performance under different feeding conditions. *Waste Manag Res* [Internet]. 38(5):537–545. <https://doi.org/10.1177/0734242X19894625>
- Hadj Saadoun J, Montevicchi G, Zanasi L, Bortolini S, Macavei LI, Masino F, Maistrello L, Antonelli A. 2020. Lipid profile and growth of black soldier flies (*Hermetia illucens*, Stratiomyidae) reared on by-products from different food chains. *J Sci Food Agric* [Internet]. 100(9):3648–3657. <https://doi.org/10.1002/jsfa.10397>
- Heuel M, Kreuzer M, Sandrock C, Leiber F, Mathys A, Gold M, Zurbrugg C, Gangnat I, Terranova M. 2021. Transfer of Lauric and Myristic Acid from Black Soldier Fly Larval Lipids to Egg Yolk Lipids of Hens Is Low. *Lipids*. 56.
- Hoc B, Francis F, Carpentier J, Lucien M, Blecker C, Giorgia P, Caparros Megido R. 2021. ω3-enrichment of *Hermetia illucens* (L. 1758) prepupae from oilseed byproducts. *J Saudi Soc Agric Sci*. 20(3):155–163.
- Jucker C, Erba D, Leonardi MG, Lupi D, Savoldelli S. 2017. Assessment of vegetable and fruit substrates as potential rearing media for *Hermetia illucens* (Diptera: *Stratiomyidae*) Larvae. *Environ Entomol* [Internet]. 46(6):1415–1423. <http://dx.doi.org/10.1093/ee/nvx154>
- Lawal KG, Kavle RR, Akanbi TO, Miroso M, Agyei D. 2021. Enrichment in specific fatty acids profile of *Tenebrio molitor* and *Hermetia illucens* larvae through feeding. *Futur Foods* [Internet]. 3:100016. <https://www.sciencedirect.com/science/article/pii/S266683352100006X>
- Leong SY, Kutty SRM. 2020. Characteristic of *Hermetia illucens* fatty acid and that of the fatty acid methyl ester synthesize based on upcycling of perishable waste. *Waste and Biomass Valorization* [Internet]. 11(10):5607–5614. <https://doi.org/10.1007/s12649-020-01018-0>
- Liland NS, Biancarosa I, Araujo P, Biemans D, Bruckner CG, Waagbø R, Torstensen BE, Lock E-JJ. 2017. Modulation of nutrient composition of black soldier fly (*Hermetia illucens*) larvae by feeding seaweed-enriched media. Wegener C, editor. *PLoS One*. 12(8):e0183188.
- Lim J-W, Mohd-Noor S-N, Wong C-Y, Lam M-K, Goh P-S, Beniers JJA, Oh W-D, Jumbri K, Ghani NA. 2019. Palatability of black soldier fly larvae in valorizing mixed waste coconut endosperm and soybean curd residue into larval lipid and protein sources. *J Environ Manage* [Internet]. 231:129–136. <http://www.sciencedirect.com/science/article/pii/S0301479718311502>
- Liu X, Chen X, Wang H, Yang Q, ur Rehman K, Li W, Cai M, Li Q, Mazza L, Zhang J, et al. 2017. Dynamic changes of nutrient composition throughout the entire life cycle of black soldier fly. *PLoS One* [Internet]. 12(8):1–21. <https://doi.org/10.1371/journal.pone.0182601>
- Mai HC, Dao ND, Lam TD, Nguyen BV, Nguyen DC, Bach LG. 2019. Purification Process, Physicochemical Properties, and Fatty Acid Composition of Black Soldier Fly (*Hermetia illucens* Linnaeus) Larvae Oil. *J Am Oil Chem Soc* [Internet]. 96(11):1303–1311. <https://aocs.onlinelibrary.wiley.com/doi/abs/10.1002/aocs.12263>
- Matthäus B, Piofczyk T, Katz H, Pudiel F. 2019. Renewable Resources from Insects: Exploitation, Properties, and Refining of Fat Obtained by Cold-Pressing from *Hermetia illucens* (Black Soldier Fly)

Larvae. Eur J Lipid Sci Technol [Internet]. 121(7):1800376.  
<https://onlinelibrary.wiley.com/doi/abs/10.1002/ejlt.201800376>

Meneguz M, Schiavone A, Gai F, Dama A, Lussiana C, Renna M, Gasco L. 2018. Effect of rearing substrate on growth performance, waste reduction efficiency and chemical composition of black soldier fly (*Hermetia illucens*) larvae. J Sci Food Agric [Internet]. 98(15):5776–5784.  
<https://doi.org/10.1002/jsfa.9127>

Mohamad L, Dina F, Abu Hasan H, Sudesh K, Baidurah S. 2020. Effect of feeding strategy on the protein and fatty acid contents of black soldier fly prepupae ( *Hermetia illucens* ) for the potential applications as animal feed and promising alternative protein-rich food. IOP Conf Ser Mater Sci Eng. 716:12006.

Moula N, Scippo M-L, Douny C, Degand G, Dawans E, Cabaraux J-F, Hornick J-L, Medigo RC, Leroy P, Francis F, Detilleux J. 2018. Performances of local poultry breed fed black soldier fly larvae reared on horse manure. Anim Nutr [Internet]. 4(1):73–78.  
<http://www.sciencedirect.com/science/article/pii/S2405654517301300>

Ooninx DGAB, van Broekhoven S, van Huis A, van Loon JJA. 2015. Feed Conversion, Survival and Development, and Composition of Four Insect Species on Diets Composed of Food By-Products. PLoS One [Internet]. 10(12):e0144601. <https://doi.org/10.1371/journal.pone.0144601>

Ooninx DGAB, Laurent S, Veenenbos ME, van Loon JJA. 2019. Dietary enrichment of edible insects with omega 3 fatty acids. Insect Sci [Internet]. n/a(n/a).  
<https://onlinelibrary.wiley.com/doi/abs/10.1111/1744-7917.12669>

Pang W, Hou D, Ke J, Chen J, Holtzapple MT, Tomberlin JK, Chen H, Zhang J, Li Q. 2019. Production of biodiesel from CO<sub>2</sub> and organic wastes by fermentation and black soldier fly. Renew Energy [Internet]. <http://www.sciencedirect.com/science/article/pii/S0960148119315903>

Rabani V, Cheatsazan H, Davani S. 2019. Proteomics and Lipidomics of Black Soldier Fly (Diptera: *Stratiomyidae*) and Blow Fly (Diptera: *Calliphoridae*) Larvae. J Insect Sci [Internet]. 19(3):29.  
<https://www.ncbi.nlm.nih.gov/pubmed/31237955>

Raksasat R, Kiatkittipong K, Kiatkittipong W, Wong CY, Lam MK, Ho YC, Oh WD, Suryawan IW, Lim JW. 2021. Blended Sewage Sludge–Palm Kernel Expeller to Enhance the Palatability of Black Soldier Fly Larvae for Biodiesel Production. Process . 9(2).

Sealey WM, Gaylord TG, Barrows FT, Tomberlin JK, McGuire MA, Ross C, St-Hilaire S. 2011. Sensory analysis of rainbow trout, *Oncorhynchus mykiss*, fed enriched black soldier fly prepupae, *Hermetia illucens*. J World Aquac Soc. 42(1):34–45.

Somroo AA, ur Rehman K, Zheng L, Cai M, Xiao X, Hu S, Mathys A, Gold M, Yu Z, Zhang J. 2019. Influence of *Lactobacillus buchneri* on soybean curd residue co-conversion by black soldier fly larvae (*Hermetia illucens*) for food and feedstock production. Waste Manag [Internet]. 86:114–122.  
<http://www.sciencedirect.com/science/article/pii/S0956053X19300200>

Sprangers T, Ottoboni M, Klootwijk C, Olyn A, Deboosere S, Meulenaer B, Michiels J, Eeckhout M, De Clercq P, De Smet S. 2017. Nutritional composition of black soldier fly ( *Hermetia illucens* ) prepupae reared on different organic waste substrates. J Sci Food Agric. 97:2594–2600.

St-Hilaire S, Cranfill K, McGuire MA, Mosley EE, Tomberlin JK, Newton L, Sealey W, Sheppard C, Irving S. 2007. Fish offal recycling by the black soldier fly produces a foodstuff high in omega-3 fatty acids. J World Aquac Soc. 38(2):309–313.

St-Hilaire S, Sheppard C, Tomberlin JK, Irving S, Newton L, McGuire MA, Mosley EE, Hardy RW, Sealey W. 2007. Fly prepupae as a feedstuff for rainbow trout, *Oncorhynchus mykiss*. J World Aquac Soc [Internet]. 38(1):59–67. <https://onlinelibrary.wiley.com/doi/abs/10.1111/j.1749-7345.2006.00073.x>

Surendra KC, Olivier R, Tomberlin JK, Jha R, Khanal SK. 2016. Bioconversion of organic wastes into biodiesel and animal feed via insect farming. Renew Energy [Internet]. 98:197–202.

<http://www.sciencedirect.com/science/article/pii/S0960148116302063>

Truzzi C, Giorgini E, Annibaldi A, Antonucci M, Illuminati S, Scarponi G, Riolo P, Isidoro N, Conti C, Zarantoniello M, et al. 2020. Fatty acids profile of black soldier fly (*Hermetia illucens*): Influence of feeding substrate based on coffee-waste silverskin enriched with microalgae. *Anim Feed Sci Technol* [Internet]. 259:114309.

<http://www.sciencedirect.com/science/article/pii/S0377840119313598>

Vargas A, Randazzo B, Riolo P, Truzzi C, Gioacchini G, Giorgini E, Loreto N, Ruschioni S, Zarantoniello M, Antonucci M, et al. 2018. Rearing Zebrafish on Black Soldier Fly (*Hermetia illucens*): Biometric, Histological, Spectroscopic, Biochemical, and Molecular Implications. *Zebrafish* [Internet]. 15(4):404–419. <https://doi.org/10.1089/zeb.2017.1559>

Wong C-Y, Rosli S-S, Uemura Y, Ho YC, Leejeerajumnean A, Kiatkittipong W, Cheng C-K, Lam M-K, Lim J-W. 2019. Potential Protein and Biodiesel Sources from Black Soldier Fly Larvae: Insights of Larval Harvesting Instar and Fermented Feeding Medium. *Energies* [Internet]. [accessed 2020 Jan 13] 12(8):1570. <https://www.mdpi.com/1996-1073/12/8/1570>

Xu X, Ji H, Belghit I, Liland NS, Wu W, Li X. 2021. Effects of black soldier fly oil rich in n-3 HUFA on growth performance, metabolism and health response of juvenile mirror carp (*Cyprinus carpio* var. *specularis*). *Aquaculture* [Internet]. 533:736144.

<https://www.sciencedirect.com/science/article/pii/S0044848620338503>

Zheng L, Hou Y, Li W, Yang S, Li Q, Yu Z. 2012. Biodiesel production from rice straw and restaurant waste employing black soldier fly assisted by microbes. *Energy* [Internet]. 47(1):225–229. <http://www.sciencedirect.com/science/article/pii/S0360544212006846>
